# Supplementary material for: Defining a Characteristic Gene Expression Set Responsible for Cancer Stem Cell-Like Features in a Sub-Population of Ewing Sarcoma Cells CADO-ES1
Source: MDPI journal article supplement (doi:10.3390/ijms19123908), 2018-12-06
Supplement: s2 [file s2]

## DAVID 6.8 - Gene Functional Classification Result - SET-1 - 312

214 genes from the list of 312 are not in the output.  
6 groups were identified.

### Options

Classification Stringency: Medium

### Kappa Similarity

Similarity Term Overlap 4

Similarity Threshold 0.3

### Classification

Initial Group Membership 4

Final Group Membership 4

Multiple Linkage Threshold 0.5

| Gene Group 1 |        | Enrichment Score:<br>15.51                                                                | RG |  |  |
|--------------|--------|-------------------------------------------------------------------------------------------|----|------------------------------------------------------------------------------------|-------------------------------------------------------------------------------------|
| 1            | MAD2L1 | <a href="#">MAD2 mitotic arrest deficient-like 1 (yeast)(MAD2L1)</a>                      |    |                                                                                    |                                                                                     |
| 2            | SPAG5  | <a href="#">sperm associated antigen 5(SPAG5)</a>                                         |    |                                                                                    |                                                                                     |
| 3            | NCAPH  | <a href="#">non-SMC condensin I complex subunit H(NCAPH)</a>                              |    |                                                                                    |                                                                                     |
| 4            | TPX2   | <a href="#">TPX2, microtubule nucleation factor(TPX2)</a>                                 |    |                                                                                    |                                                                                     |
| 5            | HJURP  | <a href="#">Holliday junction recognition protein(HJURP)</a>                              |    |                                                                                    |                                                                                     |
| 6            | KNSTRN | <a href="#">kinetochore localized astrin/SPAG5 binding protein(KNSTRN)</a>                |    |                                                                                    |                                                                                     |
| 7            | CDCA3  | <a href="#">cell division cycle associated 3(CDCA3)</a>                                   |    |                                                                                    |                                                                                     |
| 8            | PRC1   | <a href="#">protein regulator of cytokinesis 1(PRC1)</a>                                  |    |                                                                                    |                                                                                     |
| 9            | MAPRE2 | <a href="#">microtubule associated protein RP/EB family member 2(MAPRE2)</a>              |    |                                                                                    |                                                                                     |
| 10           | PSRC1  | <a href="#">proline and serine rich coiled-coil 1(PSRC1)</a>                              |    |                                                                                    |                                                                                     |
| 11           | CEP85  | <a href="#">centrosomal protein 85(CEP85)</a>                                             |    |                                                                                    |                                                                                     |
| 12           | HYLS1  | <a href="#">HYLS1, centriolar and ciliogenesis associated(HYLS1)</a>                      |    |                                                                                    |                                                                                     |
| 13           | CKAP2L | <a href="#">cytoskeleton associated protein 2 like(CKAP2L)</a>                            |    |                                                                                    |                                                                                     |
| 14           | NUF2   | <a href="#">NUF2, NDC80 kinetochore complex component(NUF2)</a>                           |    |                                                                                    |                                                                                     |
| 15           | NUSAP1 | <a href="#">nucleolar and spindle associated protein 1(NUSAP1)</a>                        |    |                                                                                    |                                                                                     |
| 16           | ERCC6L | <a href="#">ERCC excision repair 6 like, spindle assembly checkpoint helicase(ERCC6L)</a> |    |                                                                                    |                                                                                     |
| 17           | FAM83D | <a href="#">family with sequence similarity 83 member D(FAM83D)</a>                       |    |                                                                                    |                                                                                     |
| 18           | SKA3   | <a href="#">spindle and kinetochore associated complex subunit 3(SKA3)</a>                |    |                                                                                    |                                                                                     |
| 19           | CDCA8  | <a href="#">cell division cycle associated 8(CDCA8)</a>                                   |    |                                                                                    |                                                                                     |
| 20           | OIP5   | <a href="#">Opa interacting protein 5(OIP5)</a>                                           |    |                                                                                    |                                                                                     |
| 21           | DLGAP5 | <a href="#">DLG associated protein 5(DLGAP5)</a>                                          |    |                                                                                    |                                                                                     |
| 22           | KIF2C  | <a href="#">kinesin family member 2C(KIF2C)</a>                                           |    |                                                                                    |                                                                                     |
| 23           | FAM64A | <a href="#">family with sequence similarity 64 member A(FAM64A)</a>                       |    |                                                                                    |                                                                                     |
| 24           | CDCA2  | <a href="#">cell division cycle associated 2(CDCA2)</a>                                   |    |                                                                                    |                                                                                     |
| 25           | SAPCD2 | <a href="#">suppressor APC domain containing 2(SAPCD2)</a>                                |    |                                                                                    |                                                                                     |

**Gene Group 2****Enrichment Score:**  
**12.71****RG**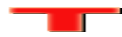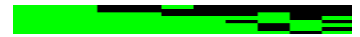

|    |           |                                                                  |
|----|-----------|------------------------------------------------------------------|
| 1  | HIST1H4H  | <a href="#">histone cluster 1 H4 family member h(HIST1H4H)</a>   |
| 2  | HIST1H1C  | <a href="#">histone cluster 1 H1 family member c(HIST1H1C)</a>   |
| 3  | HIST1H4D  | <a href="#">histone cluster 1 H4 family member d(HIST1H4D)</a>   |
| 4  | HIST1H3B  | <a href="#">histone cluster 1 H3 family member b(HIST1H3B)</a>   |
| 5  | HIST1H2AG | <a href="#">histone cluster 1 H2A family member g(HIST1H2AG)</a> |
| 6  | HIST1H3G  | <a href="#">histone cluster 1 H3 family member g(HIST1H3G)</a>   |
| 7  | HIST1H3C  | <a href="#">histone cluster 1 H3 family member c(HIST1H3C)</a>   |
| 8  | HIST1H2BC | <a href="#">histone cluster 1 H2B family member c(HIST1H2BC)</a> |
| 9  | HIST1H2BI | <a href="#">histone cluster 1 H2B family member i(HIST1H2BI)</a> |
| 10 | HIST1H2BH | <a href="#">histone cluster 1 H2B family member h(HIST1H2BH)</a> |
| 11 | CENPA     | <a href="#">centromere protein A(CENPA)</a>                      |
| 12 | HIST1H2BF | <a href="#">histone cluster 1 H2B family member f(HIST1H2BF)</a> |
| 13 | HIST1H2BN | <a href="#">histone cluster 1 H2B family member n(HIST1H2BN)</a> |
| 14 | HIST1H2BL | <a href="#">histone cluster 1 H2B family member l(HIST1H2BL)</a> |
| 15 | HIST1H2BG | <a href="#">histone cluster 1 H2B family member g(HIST1H2BG)</a> |
| 16 | HIST2H2AC | <a href="#">histone cluster 2 H2A family member c(HIST2H2AC)</a> |
| 17 | HIST1H2AL | <a href="#">histone cluster 1 H2A family member l(HIST1H2AL)</a> |
| 18 | HIST1H2AK | <a href="#">histone cluster 1 H2A family member k(HIST1H2AK)</a> |
| 19 | HIST1H2BB | <a href="#">histone cluster 1 H2B family member b(HIST1H2BB)</a> |
| 20 | HIST2H2AB | <a href="#">histone cluster 2 H2A family member b(HIST2H2AB)</a> |
| 21 | HIST1H2AE | <a href="#">histone cluster 1 H2A family member e(HIST1H2AE)</a> |

**Gene Group 3****Enrichment Score: 8.56** [RG](#)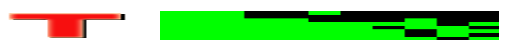

- 1 UBE2C [ubiquitin conjugating enzyme E2 C\(UBE2C\)](#)
- 2 BUB1B [BUB1 mitotic checkpoint serine/threonine kinase B\(BUB1B\)](#)
- 3 MAD2L1 [MAD2 mitotic arrest deficient-like 1 \(yeast\)\(MAD2L1\)](#)
- 4 CDC20 [cell division cycle 20\(CDC20\)](#)

**Gene Group 4****Enrichment Score: 8.12****RG**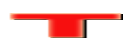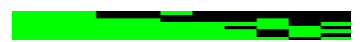

|    |       |                                                                          |
|----|-------|--------------------------------------------------------------------------|
| 1  | TNIK  | <a href="#">TRAF2 and NCK interacting kinase(TNIK)</a>                   |
| 2  | CDK1  | <a href="#">cyclin dependent kinase 1(CDK1)</a>                          |
| 3  | NEK2  | <a href="#">NIMA related kinase 2(NEK2)</a>                              |
| 4  | PLK1  | <a href="#">polo like kinase 1(PLK1)</a>                                 |
| 5  | BUB1B | <a href="#">BUB1 mitotic checkpoint serine/threonine kinase B(BUB1B)</a> |
| 6  | KIF2C | <a href="#">kinesin family member 2C(KIF2C)</a>                          |
| 7  | BUB1  | <a href="#">BUB1 mitotic checkpoint serine/threonine kinase(BUB1)</a>    |
| 8  | SGK1  | <a href="#">serum/glucocorticoid regulated kinase 1(SGK1)</a>            |
| 9  | PBK   | <a href="#">PDZ binding kinase(PBK)</a>                                  |
| 10 | AURKA | <a href="#">aurora kinase A(AURKA)</a>                                   |
| 11 | TTK   | <a href="#">TTK protein kinase(TTK)</a>                                  |
| 12 | DCLK1 | <a href="#">doublecortin like kinase 1(DCLK1)</a>                        |

**Gene Group 5****Enrichment Score: 7.94** **RG**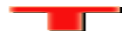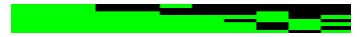

|   |        |                                                   |
|---|--------|---------------------------------------------------|
| 1 | KIF14  | <a href="#">kinesin family member 14(KIF14)</a>   |
| 2 | CENPE  | <a href="#">centromere protein E(CENPE)</a>       |
| 3 | KIF2C  | <a href="#">kinesin family member 2C(KIF2C)</a>   |
| 4 | KIF20A | <a href="#">kinesin family member 20A(KIF20A)</a> |
| 5 | KIF18A | <a href="#">kinesin family member 18A(KIF18A)</a> |
| 6 | KIF23  | <a href="#">kinesin family member 23(KIF23)</a>   |

**Gene Group 6****Enrichment Score: 2.25****RG**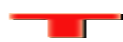

|    |        |                                                                |
|----|--------|----------------------------------------------------------------|
| 1  | ZFX    | <a href="#">zinc finger protein, X-linked(ZFX)</a>             |
| 2  | SALL1  | <a href="#">spalt like transcription factor 1(SALL1)</a>       |
| 3  | ZNF480 | <a href="#">zinc finger protein 480(ZNF480)</a>                |
| 4  | ZNF143 | <a href="#">zinc finger protein 143(ZNF143)</a>                |
| 5  | ZNF184 | <a href="#">zinc finger protein 184(ZNF184)</a>                |
| 6  | ZNF789 | <a href="#">zinc finger protein 789(ZNF789)</a>                |
| 7  | ZBTB2  | <a href="#">zinc finger and BTB domain containing 2(ZBTB2)</a> |
| 8  | ZNF367 | <a href="#">zinc finger protein 367(ZNF367)</a>                |
| 9  | KLF6   | <a href="#">Kruppel like factor 6(KLF6)</a>                    |
| 10 | ZNF267 | <a href="#">zinc finger protein 267(ZNF267)</a>                |

**Gene List Report**  
**Current Background: Homo sapiens**  
**288 DAVID IDs of 312**

| OFFICIAL_GENE_SYMBOL | Gene Name                                                                            | Related Genes      | Species                      |
|----------------------|--------------------------------------------------------------------------------------|--------------------|------------------------------|
| ABCB1                | <a href="#">ATP binding cassette subfamily B member 1(ABCB1)</a>                     | <a href="#">RG</a> | <a href="#">Homo sapiens</a> |
| ACTL6A               | <a href="#">actin like 6A(ACTL6A)</a>                                                | <a href="#">RG</a> | <a href="#">Homo sapiens</a> |
| ADM2                 | <a href="#">adrenomedullin 2(ADM2)</a>                                               | <a href="#">RG</a> | <a href="#">Homo sapiens</a> |
| AKR1C2               | <a href="#">aldo-keto reductase family 1 member C2(AKR1C2)</a>                       | <a href="#">RG</a> | <a href="#">Homo sapiens</a> |
| ANK3                 | <a href="#">ankyrin 3(ANK3)</a>                                                      | <a href="#">RG</a> | <a href="#">Homo sapiens</a> |
| APOLD1               | <a href="#">apolipoprotein L domain containing 1(APOLD1)</a>                         | <a href="#">RG</a> | <a href="#">Homo sapiens</a> |
| ARL6IP1              | <a href="#">ADP ribosylation factor like GTPase 6 interacting protein 1(ARL6IP1)</a> | <a href="#">RG</a> | <a href="#">Homo sapiens</a> |
| ASPM                 | <a href="#">abnormal spindle microtubule assembly(ASPM)</a>                          | <a href="#">RG</a> | <a href="#">Homo sapiens</a> |
| ASS1                 | <a href="#">argininosuccinate synthase 1(ASS1)</a>                                   | <a href="#">RG</a> | <a href="#">Homo sapiens</a> |
| ATAD3C               | <a href="#">ATPase family, AAA domain containing 3C(ATAD3C)</a>                      | <a href="#">RG</a> | <a href="#">Homo sapiens</a> |
| ATF1                 | <a href="#">activating transcription factor 1(ATF1)</a>                              | <a href="#">RG</a> | <a href="#">Homo sapiens</a> |
| ATG3                 | <a href="#">autophagy related 3(ATG3)</a>                                            | <a href="#">RG</a> | <a href="#">Homo sapiens</a> |
| ATP11B               | <a href="#">ATPase phospholipid transporting 11B (putative)(ATP11B)</a>              | <a href="#">RG</a> | <a href="#">Homo sapiens</a> |
| AURKA                | <a href="#">aurora kinase A(AURKA)</a>                                               | <a href="#">RG</a> | <a href="#">Homo sapiens</a> |
| AUTS2                | <a href="#">autism susceptibility candidate 2(AUTS2)</a>                             | <a href="#">RG</a> | <a href="#">Homo sapiens</a> |
| BCYRN1               | <a href="#">brain cytoplasmic RNA 1(BCYRN1)</a>                                      | <a href="#">RG</a> | <a href="#">Homo sapiens</a> |
| BRIX1                | <a href="#">BRX1, biogenesis of ribosomes(BRIX1)</a>                                 | <a href="#">RG</a> | <a href="#">Homo sapiens</a> |
| BUB1                 | <a href="#">BUB1 mitotic checkpoint serine/threonine kinase(BUB1)</a>                | <a href="#">RG</a> | <a href="#">Homo sapiens</a> |
| BUB1B                | <a href="#">BUB1 mitotic checkpoint serine/threonine kinase B(BUB1B)</a>             | <a href="#">RG</a> | <a href="#">Homo sapiens</a> |
| C4orf48              | <a href="#">chromosome 4 open reading frame 48(C4orf48)</a>                          | <a href="#">RG</a> | <a href="#">Homo sapiens</a> |
| CACNG8               | <a href="#">calcium voltage-gated channel auxiliary</a>                              | <a href="#">RG</a> | <a href="#">Homo</a>         |

| OFFICIAL_GENE_SYMBOL | Gene Name                                                                       | Related Genes      | Species                      |
|----------------------|---------------------------------------------------------------------------------|--------------------|------------------------------|
|                      | <a href="#">subunit gamma 8(CACNG8)</a>                                         |                    | <a href="#">sapiens</a>      |
| CAPN10-AS1           | <a href="#">CAPN10 antisense RNA 1 (head to head)(CAPN10-AS1)</a>               | <a href="#">RG</a> | <a href="#">Homo sapiens</a> |
| CAV1                 | <a href="#">caveolin 1(CAV1)</a>                                                | <a href="#">RG</a> | <a href="#">Homo sapiens</a> |
| CCNA2                | <a href="#">cyclin A2(CCNA2)</a>                                                | <a href="#">RG</a> | <a href="#">Homo sapiens</a> |
| CCNB1                | <a href="#">cyclin B1(CCNB1)</a>                                                | <a href="#">RG</a> | <a href="#">Homo sapiens</a> |
| CCNB2                | <a href="#">cyclin B2(CCNB2)</a>                                                | <a href="#">RG</a> | <a href="#">Homo sapiens</a> |
| CDC20                | <a href="#">cell division cycle 20(CDC20)</a>                                   | <a href="#">RG</a> | <a href="#">Homo sapiens</a> |
| CDC25C               | <a href="#">cell division cycle 25C(CDC25C)</a>                                 | <a href="#">RG</a> | <a href="#">Homo sapiens</a> |
| CDCA2                | <a href="#">cell division cycle associated 2(CDCA2)</a>                         | <a href="#">RG</a> | <a href="#">Homo sapiens</a> |
| CDCA3                | <a href="#">cell division cycle associated 3(CDCA3)</a>                         | <a href="#">RG</a> | <a href="#">Homo sapiens</a> |
| CDCA8                | <a href="#">cell division cycle associated 8(CDCA8)</a>                         | <a href="#">RG</a> | <a href="#">Homo sapiens</a> |
| CDH17                | <a href="#">cadherin 17(CDH17)</a>                                              | <a href="#">RG</a> | <a href="#">Homo sapiens</a> |
| CDK1                 | <a href="#">cyclin dependent kinase 1(CDK1)</a>                                 | <a href="#">RG</a> | <a href="#">Homo sapiens</a> |
| CDK6                 | <a href="#">cyclin dependent kinase 6(CDK6)</a>                                 | <a href="#">RG</a> | <a href="#">Homo sapiens</a> |
| CDKN2C               | <a href="#">cyclin dependent kinase inhibitor 2C(CDKN2C)</a>                    | <a href="#">RG</a> | <a href="#">Homo sapiens</a> |
| CDKN3                | <a href="#">cyclin dependent kinase inhibitor 3(CDKN3)</a>                      | <a href="#">RG</a> | <a href="#">Homo sapiens</a> |
| CENPA                | <a href="#">centromere protein A(CENPA)</a>                                     | <a href="#">RG</a> | <a href="#">Homo sapiens</a> |
| CENPE                | <a href="#">centromere protein E(CENPE)</a>                                     | <a href="#">RG</a> | <a href="#">Homo sapiens</a> |
| CEP55                | <a href="#">centrosomal protein 55(CEP55)</a>                                   | <a href="#">RG</a> | <a href="#">Homo sapiens</a> |
| CEP85                | <a href="#">centrosomal protein 85(CEP85)</a>                                   | <a href="#">RG</a> | <a href="#">Homo sapiens</a> |
| CHCHD7               | <a href="#">coiled-coil-helix-coiled-coil-helix domain containing 7(CHCHD7)</a> | <a href="#">RG</a> | <a href="#">Homo sapiens</a> |
| CKAP2L               | <a href="#">cytoskeleton associated protein 2 like(CKAP2L)</a>                  | <a href="#">RG</a> | <a href="#">Homo sapiens</a> |
| CKS2                 | <a href="#">CDC28 protein kinase regulatory subunit 2(CKS2)</a>                 | <a href="#">RG</a> | <a href="#">Homo sapiens</a> |



| OFFICIAL_GENE_SYMBOL | Gene Name                                                                     | Related Genes      | Species                      |
|----------------------|-------------------------------------------------------------------------------|--------------------|------------------------------|
| CLIP3                | <a href="#">CAP-Gly domain containing linker protein 3(CLIP3)</a>             | <a href="#">RG</a> | <a href="#">Homo sapiens</a> |
| COPS3                | <a href="#">COP9 signalosome subunit 3(COPS3)</a>                             | <a href="#">RG</a> | <a href="#">Homo sapiens</a> |
| CRIM1                | <a href="#">cysteine rich transmembrane BMP regulator 1(CRIM1)</a>            | <a href="#">RG</a> | <a href="#">Homo sapiens</a> |
| CSE1L                | <a href="#">chromosome segregation 1 like(CSE1L)</a>                          | <a href="#">RG</a> | <a href="#">Homo sapiens</a> |
| CSRNP2               | <a href="#">cysteine and serine rich nuclear protein 2(CSRNP2)</a>            | <a href="#">RG</a> | <a href="#">Homo sapiens</a> |
| CTGF                 | <a href="#">connective tissue growth factor(CTGF)</a>                         | <a href="#">RG</a> | <a href="#">Homo sapiens</a> |
| CTTNBP2              | <a href="#">cortactin binding protein 2(CTTNBP2)</a>                          | <a href="#">RG</a> | <a href="#">Homo sapiens</a> |
| CXCL1                | <a href="#">C-X-C motif chemokine ligand 1(CXCL1)</a>                         | <a href="#">RG</a> | <a href="#">Homo sapiens</a> |
| CYR61                | <a href="#">cysteine rich angiogenic inducer 61(CYR61)</a>                    | <a href="#">RG</a> | <a href="#">Homo sapiens</a> |
| DCLK1                | <a href="#">doublecortin like kinase 1(DCLK1)</a>                             | <a href="#">RG</a> | <a href="#">Homo sapiens</a> |
| DDX21                | <a href="#">DEXD-box helicase 21(DDX21)</a>                                   | <a href="#">RG</a> | <a href="#">Homo sapiens</a> |
| DEPDC1               | <a href="#">DEP domain containing 1(DEPDC1)</a>                               | <a href="#">RG</a> | <a href="#">Homo sapiens</a> |
| DHRS11               | <a href="#">dehydrogenase/reductase 11(DHRS11)</a>                            | <a href="#">RG</a> | <a href="#">Homo sapiens</a> |
| DIMT1                | <a href="#">DIM1 dimethyladenosine transferase 1 homolog(DIMT1)</a>           | <a href="#">RG</a> | <a href="#">Homo sapiens</a> |
| DLEU2                | <a href="#">deleted in lymphocytic leukemia 2 (non-protein coding)(DLEU2)</a> | <a href="#">RG</a> | <a href="#">Homo sapiens</a> |
| DLGAP5               | <a href="#">DLG associated protein 5(DLGAP5)</a>                              | <a href="#">RG</a> | <a href="#">Homo sapiens</a> |
| DNAH8                | <a href="#">dynein axonemal heavy chain 8(DNAH8)</a>                          | <a href="#">RG</a> | <a href="#">Homo sapiens</a> |
| DNAJC8               | <a href="#">DnaJ heat shock protein family (Hsp40) member C8(DNAJC8)</a>      | <a href="#">RG</a> | <a href="#">Homo sapiens</a> |
| DPYSL3               | <a href="#">dihydropyrimidinase like 3(DPYSL3)</a>                            | <a href="#">RG</a> | <a href="#">Homo sapiens</a> |
| DUSP1                | <a href="#">dual specificity phosphatase 1(DUSP1)</a>                         | <a href="#">RG</a> | <a href="#">Homo sapiens</a> |
| E2F5                 | <a href="#">E2F transcription factor 5(E2F5)</a>                              | <a href="#">RG</a> | <a href="#">Homo sapiens</a> |
| EBLN2                | <a href="#">endogenous Bornavirus-like nucleoprotein 2(EBLN2)</a>             | <a href="#">RG</a> | <a href="#">Homo sapiens</a> |
| EEF1A1P5             | <a href="#">eukaryotic translation elongation factor 1</a>                    | <a href="#">RG</a> | <a href="#">Homo</a>         |

| OFFICIAL_GENE_SYMBOL | Gene Name                                                                                 | Related Genes      | Species                      |
|----------------------|-------------------------------------------------------------------------------------------|--------------------|------------------------------|
|                      | <a href="#">alpha 1 pseudogene 5(EEF1A1P5)</a>                                            |                    | <a href="#">sapiens</a>      |
| ELMO1                | <a href="#">engulfment and cell motility 1(ELMO1)</a>                                     | <a href="#">RG</a> | <a href="#">Homo sapiens</a> |
| ENPP2                | <a href="#">ectonucleotide pyrophosphatase/phosphodiesterase 2(ENPP2)</a>                 | <a href="#">RG</a> | <a href="#">Homo sapiens</a> |
| EPC1                 | <a href="#">enhancer of polycomb homolog 1(EPC1)</a>                                      | <a href="#">RG</a> | <a href="#">Homo sapiens</a> |
| ERAP1                | <a href="#">endoplasmic reticulum aminopeptidase 1(ERAP1)</a>                             | <a href="#">RG</a> | <a href="#">Homo sapiens</a> |
| ERCC6L               | <a href="#">ERCC excision repair 6 like, spindle assembly checkpoint helicase(ERCC6L)</a> | <a href="#">RG</a> | <a href="#">Homo sapiens</a> |
| FABP4                | <a href="#">fatty acid binding protein 4(FABP4)</a>                                       | <a href="#">RG</a> | <a href="#">Homo sapiens</a> |
| FABP5                | <a href="#">fatty acid binding protein 5(FABP5)</a>                                       | <a href="#">RG</a> | <a href="#">Homo sapiens</a> |
| FAM64A               | <a href="#">family with sequence similarity 64 member A(FAM64A)</a>                       | <a href="#">RG</a> | <a href="#">Homo sapiens</a> |
| FAM72A               | <a href="#">family with sequence similarity 72 member A(FAM72A)</a>                       | <a href="#">RG</a> | <a href="#">Homo sapiens</a> |
| FAM83D               | <a href="#">family with sequence similarity 83 member D(FAM83D)</a>                       | <a href="#">RG</a> | <a href="#">Homo sapiens</a> |
| FOPNL                | <a href="#">FGFR1OP N-terminal like(FOPNL)</a>                                            | <a href="#">RG</a> | <a href="#">Homo sapiens</a> |
| FOS                  | <a href="#">Fos proto-oncogene, AP-1 transcription factor subunit(FOS)</a>                | <a href="#">RG</a> | <a href="#">Homo sapiens</a> |
| FOSB                 | <a href="#">FosB proto-oncogene, AP-1 transcription factor subunit(FOSB)</a>              | <a href="#">RG</a> | <a href="#">Homo sapiens</a> |
| FOSL2                | <a href="#">FOS like 2, AP-1 transcription factor subunit(FOSL2)</a>                      | <a href="#">RG</a> | <a href="#">Homo sapiens</a> |
| FOXO1                | <a href="#">forkhead box O1(FOXO1)</a>                                                    | <a href="#">RG</a> | <a href="#">Homo sapiens</a> |
| FTH1                 | <a href="#">ferritin heavy chain 1(FTH1)</a>                                              | <a href="#">RG</a> | <a href="#">Homo sapiens</a> |
| GAS2L3               | <a href="#">growth arrest specific 2 like 3(GAS2L3)</a>                                   | <a href="#">RG</a> | <a href="#">Homo sapiens</a> |
| GNB3                 | <a href="#">G protein subunit beta 3(GNB3)</a>                                            | <a href="#">RG</a> | <a href="#">Homo sapiens</a> |
| GPSM2                | <a href="#">G-protein signaling modulator 2(GPSM2)</a>                                    | <a href="#">RG</a> | <a href="#">Homo sapiens</a> |
| HDAC9                | <a href="#">histone deacetylase 9(HDAC9)</a>                                              | <a href="#">RG</a> | <a href="#">Homo sapiens</a> |
| HES1                 | <a href="#">hes family bHLH transcription factor 1(HES1)</a>                              | <a href="#">RG</a> | <a href="#">Homo sapiens</a> |
| HIST1H1C             | <a href="#">histone cluster 1 H1 family member</a>                                        | <a href="#">RG</a> | <a href="#">Homo</a>         |

| OFFICIAL_GENE_SYMBOL | Gene Name                                                        | Related Genes      | Species                      |
|----------------------|------------------------------------------------------------------|--------------------|------------------------------|
|                      | <a href="#">c(HIST1H1C)</a>                                      |                    | <a href="#">sapiens</a>      |
| HIST1H2AE            | <a href="#">histone cluster 1 H2A family member e(HIST1H2AE)</a> | <a href="#">RG</a> | <a href="#">Homo sapiens</a> |
| HIST1H2AG            | <a href="#">histone cluster 1 H2A family member g(HIST1H2AG)</a> | <a href="#">RG</a> | <a href="#">Homo sapiens</a> |
| HIST1H2AK            | <a href="#">histone cluster 1 H2A family member k(HIST1H2AK)</a> | <a href="#">RG</a> | <a href="#">Homo sapiens</a> |
| HIST1H2AL            | <a href="#">histone cluster 1 H2A family member l(HIST1H2AL)</a> | <a href="#">RG</a> | <a href="#">Homo sapiens</a> |
| HIST1H2BB            | <a href="#">histone cluster 1 H2B family member b(HIST1H2BB)</a> | <a href="#">RG</a> | <a href="#">Homo sapiens</a> |
| HIST1H2BC            | <a href="#">histone cluster 1 H2B family member c(HIST1H2BC)</a> | <a href="#">RG</a> | <a href="#">Homo sapiens</a> |
| HIST1H2BF            | <a href="#">histone cluster 1 H2B family member f(HIST1H2BF)</a> | <a href="#">RG</a> | <a href="#">Homo sapiens</a> |
| HIST1H2BG            | <a href="#">histone cluster 1 H2B family member g(HIST1H2BG)</a> | <a href="#">RG</a> | <a href="#">Homo sapiens</a> |
| HIST1H2BH            | <a href="#">histone cluster 1 H2B family member h(HIST1H2BH)</a> | <a href="#">RG</a> | <a href="#">Homo sapiens</a> |
| HIST1H2BI            | <a href="#">histone cluster 1 H2B family member i(HIST1H2BI)</a> | <a href="#">RG</a> | <a href="#">Homo sapiens</a> |
| HIST1H2BL            | <a href="#">histone cluster 1 H2B family member l(HIST1H2BL)</a> | <a href="#">RG</a> | <a href="#">Homo sapiens</a> |
| HIST1H2BN            | <a href="#">histone cluster 1 H2B family member n(HIST1H2BN)</a> | <a href="#">RG</a> | <a href="#">Homo sapiens</a> |
| HIST1H3B             | <a href="#">histone cluster 1 H3 family member b(HIST1H3B)</a>   | <a href="#">RG</a> | <a href="#">Homo sapiens</a> |
| HIST1H3C             | <a href="#">histone cluster 1 H3 family member c(HIST1H3C)</a>   | <a href="#">RG</a> | <a href="#">Homo sapiens</a> |
| HIST1H3G             | <a href="#">histone cluster 1 H3 family member g(HIST1H3G)</a>   | <a href="#">RG</a> | <a href="#">Homo sapiens</a> |
| HIST1H4D             | <a href="#">histone cluster 1 H4 family member d(HIST1H4D)</a>   | <a href="#">RG</a> | <a href="#">Homo sapiens</a> |
| HIST1H4H             | <a href="#">histone cluster 1 H4 family member h(HIST1H4H)</a>   | <a href="#">RG</a> | <a href="#">Homo sapiens</a> |
| HIST2H2AB            | <a href="#">histone cluster 2 H2A family member b(HIST2H2AB)</a> | <a href="#">RG</a> | <a href="#">Homo sapiens</a> |
| HIST2H2AC            | <a href="#">histone cluster 2 H2A family member c(HIST2H2AC)</a> | <a href="#">RG</a> | <a href="#">Homo sapiens</a> |
| HJURP                | <a href="#">Holliday junction recognition protein(HJURP)</a>     | <a href="#">RG</a> | <a href="#">Homo sapiens</a> |
| HMGB2                | <a href="#">high mobility group box 2(HMGB2)</a>                 | <a href="#">RG</a> | <a href="#">Homo sapiens</a> |
| HMMR                 | <a href="#">hyaluronan mediated motility receptor(HMMR)</a>      | <a href="#">RG</a> | <a href="#">Homo sapiens</a> |

| OFFICIAL_GENE_SYMBOL | Gene Name                                                                                   | Related Genes      | Species                      |
|----------------------|---------------------------------------------------------------------------------------------|--------------------|------------------------------|
| HSP90AA1             | <a href="#">heat shock protein 90 alpha family class A member 1(HSP90AA1)</a>               | <a href="#">RG</a> | <a href="#">Homo sapiens</a> |
| HSPH1                | <a href="#">heat shock protein family H (Hsp110) member 1(HSPH1)</a>                        | <a href="#">RG</a> | <a href="#">Homo sapiens</a> |
| HYLS1                | <a href="#">HYLS1, centriolar and ciliogenesis associated(HYLS1)</a>                        | <a href="#">RG</a> | <a href="#">Homo sapiens</a> |
| ID1                  | <a href="#">inhibitor of DNA binding 1, HLH protein(ID1)</a>                                | <a href="#">RG</a> | <a href="#">Homo sapiens</a> |
| ID2                  | <a href="#">inhibitor of DNA binding 2, HLH protein(ID2)</a>                                | <a href="#">RG</a> | <a href="#">Homo sapiens</a> |
| ISG15                | <a href="#">ISG15 ubiquitin-like modifier(ISG15)</a>                                        | <a href="#">RG</a> | <a href="#">Homo sapiens</a> |
| JPH1                 | <a href="#">junctophilin 1(JPH1)</a>                                                        | <a href="#">RG</a> | <a href="#">Homo sapiens</a> |
| JUN                  | <a href="#">Jun proto-oncogene, AP-1 transcription factor subunit(JUN)</a>                  | <a href="#">RG</a> | <a href="#">Homo sapiens</a> |
| KBTBD2               | <a href="#">kelch repeat and BTB domain containing 2(KBTBD2)</a>                            | <a href="#">RG</a> | <a href="#">Homo sapiens</a> |
| KBTBD8               | <a href="#">kelch repeat and BTB domain containing 8(KBTBD8)</a>                            | <a href="#">RG</a> | <a href="#">Homo sapiens</a> |
| KCNQ1OT1             | <a href="#">KCNQ1 opposite strand/antisense transcript 1 (non-protein coding)(KCNQ1OT1)</a> | <a href="#">RG</a> | <a href="#">Homo sapiens</a> |
| KIF14                | <a href="#">kinesin family member 14(KIF14)</a>                                             | <a href="#">RG</a> | <a href="#">Homo sapiens</a> |
| KIF18A               | <a href="#">kinesin family member 18A(KIF18A)</a>                                           | <a href="#">RG</a> | <a href="#">Homo sapiens</a> |
| KIF20A               | <a href="#">kinesin family member 20A(KIF20A)</a>                                           | <a href="#">RG</a> | <a href="#">Homo sapiens</a> |
| KIF23                | <a href="#">kinesin family member 23(KIF23)</a>                                             | <a href="#">RG</a> | <a href="#">Homo sapiens</a> |
| KIF2C                | <a href="#">kinesin family member 2C(KIF2C)</a>                                             | <a href="#">RG</a> | <a href="#">Homo sapiens</a> |
| KLF6                 | <a href="#">Kruppel like factor 6(KLF6)</a>                                                 | <a href="#">RG</a> | <a href="#">Homo sapiens</a> |
| KNSTRN               | <a href="#">kinetochore localized astrin/SPAG5 binding protein(KNSTRN)</a>                  | <a href="#">RG</a> | <a href="#">Homo sapiens</a> |
| KPNA2                | <a href="#">karyopherin subunit alpha 2(KPNA2)</a>                                          | <a href="#">RG</a> | <a href="#">Homo sapiens</a> |
| LDHA                 | <a href="#">lactate dehydrogenase A(LDHA)</a>                                               | <a href="#">RG</a> | <a href="#">Homo sapiens</a> |
| LIN9                 | <a href="#">lin-9 DREAM MuvB core complex component(LIN9)</a>                               | <a href="#">RG</a> | <a href="#">Homo sapiens</a> |
| LINC00342            | <a href="#">long intergenic non-protein coding RNA 342(LINC00342)</a>                       | <a href="#">RG</a> | <a href="#">Homo sapiens</a> |

| OFFICIAL_GENE_SYMBOL | Gene Name                                                                                                     | Related Genes      | Species                      |
|----------------------|---------------------------------------------------------------------------------------------------------------|--------------------|------------------------------|
| LINC00685            | <a href="#">long intergenic non-protein coding RNA 685(LINC00685)</a>                                         | <a href="#">RG</a> | <a href="#">Homo sapiens</a> |
| LMO7                 | <a href="#">LIM domain 7(LMO7)</a>                                                                            | <a href="#">RG</a> | <a href="#">Homo sapiens</a> |
| LRIG3                | <a href="#">leucine rich repeats and immunoglobulin like domains 3(LRIG3)</a>                                 | <a href="#">RG</a> | <a href="#">Homo sapiens</a> |
| LRP1                 | <a href="#">LDL receptor related protein 1(LRP1)</a>                                                          | <a href="#">RG</a> | <a href="#">Homo sapiens</a> |
| LUZP1                | <a href="#">leucine zipper protein 1(LUZP1)</a>                                                               | <a href="#">RG</a> | <a href="#">Homo sapiens</a> |
| LY6H                 | <a href="#">lymphocyte antigen 6 complex, locus H(LY6H)</a>                                                   | <a href="#">RG</a> | <a href="#">Homo sapiens</a> |
| MAD2L1               | <a href="#">MAD2 mitotic arrest deficient-like 1 (yeast)(MAD2L1)</a>                                          | <a href="#">RG</a> | <a href="#">Homo sapiens</a> |
| MAPRE2               | <a href="#">microtubule associated protein RP/EB family member 2(MAPRE2)</a>                                  | <a href="#">RG</a> | <a href="#">Homo sapiens</a> |
| MEG3                 | <a href="#">maternally expressed 3 (non-protein coding)(MEG3)</a>                                             | <a href="#">RG</a> | <a href="#">Homo sapiens</a> |
| MIAT                 | <a href="#">myocardial infarction associated transcript (non-protein coding)(MIAT)</a>                        | <a href="#">RG</a> | <a href="#">Homo sapiens</a> |
| MIR222HG             | <a href="#">MIR222 host gene(MIR222HG)</a>                                                                    | <a href="#">RG</a> | <a href="#">Homo sapiens</a> |
| MIR663AHG            | <a href="#">MIR663A host gene(MIR663AHG)</a>                                                                  | <a href="#">RG</a> | <a href="#">Homo sapiens</a> |
| MKX                  | <a href="#">mohawk homeobox(MKX)</a>                                                                          | <a href="#">RG</a> | <a href="#">Homo sapiens</a> |
| MLC1                 | <a href="#">megalencephalic leukoencephalopathy with subcortical cysts 1(MLC1)</a>                            | <a href="#">RG</a> | <a href="#">Homo sapiens</a> |
| MPP4                 | <a href="#">membrane palmitoylated protein 4(MPP4)</a>                                                        | <a href="#">RG</a> | <a href="#">Homo sapiens</a> |
| MSL2                 | <a href="#">male-specific lethal 2 homolog (Drosophila)(MSL2)</a>                                             | <a href="#">RG</a> | <a href="#">Homo sapiens</a> |
| MTCO2P22             | <a href="#">mitochondrially encoded cytochrome c oxidase II pseudogene 22(MTCO2P22)</a>                       | <a href="#">RG</a> | <a href="#">Homo sapiens</a> |
| MTND1P23             | <a href="#">mitochondrially encoded NADH:ubiquinone oxidoreductase core subunit 1 pseudogene 23(MTND1P23)</a> | <a href="#">RG</a> | <a href="#">Homo sapiens</a> |
| MTND2P28             | <a href="#">mitochondrially encoded NADH:ubiquinone oxidoreductase core subunit 2 pseudogene 28(MTND2P28)</a> | <a href="#">RG</a> | <a href="#">Homo sapiens</a> |
| MTND5P11             | <a href="#">mitochondrially encoded NADH:ubiquinone oxidoreductase core subunit 5 pseudogene 11(MTND5P11)</a> | <a href="#">RG</a> | <a href="#">Homo sapiens</a> |
| MTRNR2L13            | <a href="#">MT-RNR2-like 13(MTRNR2L13)</a>                                                                    | <a href="#">RG</a> | <a href="#">Homo sapiens</a> |
| MUC19                | <a href="#">mucin 19, oligomeric(MUC19)</a>                                                                   | <a href="#">RG</a> | <a href="#">Homo</a>         |

| OFFICIAL_GENE_SYMBOL | Gene Name                                                                             | Related Genes      | Species                      |
|----------------------|---------------------------------------------------------------------------------------|--------------------|------------------------------|
|                      |                                                                                       |                    | <a href="#">sapiens</a>      |
| MYC                  | <a href="#">v-myc avian myelocytomatosis viral oncogene homolog(MYC)</a>              | <a href="#">RG</a> | <a href="#">Homo sapiens</a> |
| NBPF10               | <a href="#">neuroblastoma breakpoint family member 10(NBPF10)</a>                     | <a href="#">RG</a> | <a href="#">Homo sapiens</a> |
| NCAPD3               | <a href="#">non-SMC condensin II complex subunit D3(NCAPD3)</a>                       | <a href="#">RG</a> | <a href="#">Homo sapiens</a> |
| NCAPH                | <a href="#">non-SMC condensin I complex subunit H(NCAPH)</a>                          | <a href="#">RG</a> | <a href="#">Homo sapiens</a> |
| NCOR2                | <a href="#">nuclear receptor corepressor 2(NCOR2)</a>                                 | <a href="#">RG</a> | <a href="#">Homo sapiens</a> |
| NDC1                 | <a href="#">NDC1 transmembrane nucleoporin(NDC1)</a>                                  | <a href="#">RG</a> | <a href="#">Homo sapiens</a> |
| NEAT1                | <a href="#">nuclear paraspeckle assembly transcript 1 (non-protein coding)(NEAT1)</a> | <a href="#">RG</a> | <a href="#">Homo sapiens</a> |
| NEK2                 | <a href="#">NIMA related kinase 2(NEK2)</a>                                           | <a href="#">RG</a> | <a href="#">Homo sapiens</a> |
| NOP16                | <a href="#">NOP16 nucleolar protein(NOP16)</a>                                        | <a href="#">RG</a> | <a href="#">Homo sapiens</a> |
| NPAT                 | <a href="#">nuclear protein, coactivator of histone transcription(NPAT)</a>           | <a href="#">RG</a> | <a href="#">Homo sapiens</a> |
| NPM1P5               | <a href="#">nucleophosmin 1 pseudogene 5(NPM1P5)</a>                                  | <a href="#">RG</a> | <a href="#">Homo sapiens</a> |
| NPW                  | <a href="#">neuropeptide W(NPW)</a>                                                   | <a href="#">RG</a> | <a href="#">Homo sapiens</a> |
| NRIP1                | <a href="#">nuclear receptor interacting protein 1(NRIP1)</a>                         | <a href="#">RG</a> | <a href="#">Homo sapiens</a> |
| NRXN3                | <a href="#">neurexin 3(NRXN3)</a>                                                     | <a href="#">RG</a> | <a href="#">Homo sapiens</a> |
| NSDHL                | <a href="#">NAD(P) dependent steroid dehydrogenase-like(NSDHL)</a>                    | <a href="#">RG</a> | <a href="#">Homo sapiens</a> |
| NUF2                 | <a href="#">NUF2, NDC80 kinetochore complex component(NUF2)</a>                       | <a href="#">RG</a> | <a href="#">Homo sapiens</a> |
| NUP35                | <a href="#">nucleoporin 35(NUP35)</a>                                                 | <a href="#">RG</a> | <a href="#">Homo sapiens</a> |
| NUSAP1               | <a href="#">nucleolar and spindle associated protein 1(NUSAP1)</a>                    | <a href="#">RG</a> | <a href="#">Homo sapiens</a> |
| OBSCN                | <a href="#">obscurin, cytoskeletal calmodulin and titin-interacting RhoGEF(OBSCN)</a> | <a href="#">RG</a> | <a href="#">Homo sapiens</a> |
| OIP5                 | <a href="#">Opa interacting protein 5(OIP5)</a>                                       | <a href="#">RG</a> | <a href="#">Homo sapiens</a> |
| P3H2                 | <a href="#">prolyl 3-hydroxylase 2(P3H2)</a>                                          | <a href="#">RG</a> | <a href="#">Homo sapiens</a> |
| PBK                  | <a href="#">PDZ binding kinase(PBK)</a>                                               | <a href="#">RG</a> | <a href="#">Homo sapiens</a> |

| OFFICIAL_GENE_SYMBOL | Gene Name                                                                         | Related Genes      | Species                      |
|----------------------|-----------------------------------------------------------------------------------|--------------------|------------------------------|
| PDZD7                | <a href="#">PDZ domain containing 7(PDZD7)</a>                                    | <a href="#">RG</a> | <a href="#">Homo sapiens</a> |
| PGM5P2               | <a href="#">phosphoglucomutase 5 pseudogene 2(PGM5P2)</a>                         | <a href="#">RG</a> | <a href="#">Homo sapiens</a> |
| PLEKHF2              | <a href="#">pleckstrin homology and FYVE domain containing 2(PLEKHF2)</a>         | <a href="#">RG</a> | <a href="#">Homo sapiens</a> |
| PLK1                 | <a href="#">polo like kinase 1(PLK1)</a>                                          | <a href="#">RG</a> | <a href="#">Homo sapiens</a> |
| PLXNA3               | <a href="#">plexin A3(PLXNA3)</a>                                                 | <a href="#">RG</a> | <a href="#">Homo sapiens</a> |
| PNPT1                | <a href="#">polyribonucleotide nucleotidyltransferase 1(PNPT1)</a>                | <a href="#">RG</a> | <a href="#">Homo sapiens</a> |
| POPDC3               | <a href="#">popeye domain containing 3(POPDC3)</a>                                | <a href="#">RG</a> | <a href="#">Homo sapiens</a> |
| PRC1                 | <a href="#">protein regulator of cytokinesis 1(PRC1)</a>                          | <a href="#">RG</a> | <a href="#">Homo sapiens</a> |
| PRPS1                | <a href="#">phosphoribosyl pyrophosphate synthetase 1(PRPS1)</a>                  | <a href="#">RG</a> | <a href="#">Homo sapiens</a> |
| PSRC1                | <a href="#">proline and serine rich coiled-coil 1(PSRC1)</a>                      | <a href="#">RG</a> | <a href="#">Homo sapiens</a> |
| PTPRD                | <a href="#">protein tyrosine phosphatase, receptor type D(PTPRD)</a>              | <a href="#">RG</a> | <a href="#">Homo sapiens</a> |
| PWWP2A               | <a href="#">PWWP domain containing 2A(PWWP2A)</a>                                 | <a href="#">RG</a> | <a href="#">Homo sapiens</a> |
| RACGAP1              | <a href="#">Rac GTPase activating protein 1(RACGAP1)</a>                          | <a href="#">RG</a> | <a href="#">Homo sapiens</a> |
| RALGAPA2             | <a href="#">Ral GTPase activating protein catalytic alpha subunit 2(RALGAPA2)</a> | <a href="#">RG</a> | <a href="#">Homo sapiens</a> |
| RANGAP1              | <a href="#">Ran GTPase activating protein 1(RANGAP1)</a>                          | <a href="#">RG</a> | <a href="#">Homo sapiens</a> |
| RHOBTB3              | <a href="#">Rho related BTB domain containing 3(RHOBTB3)</a>                      | <a href="#">RG</a> | <a href="#">Homo sapiens</a> |
| RN7SKP160            | <a href="#">RNA, 7SK small nuclear pseudogene 160(RN7SKP160)</a>                  | <a href="#">RG</a> | <a href="#">Homo sapiens</a> |
| RN7SKP9              | <a href="#">RNA, 7SK small nuclear pseudogene 9(RN7SKP9)</a>                      | <a href="#">RG</a> | <a href="#">Homo sapiens</a> |
| RN7SL107P            | <a href="#">RNA, 7SL, cytoplasmic 107, pseudogene(RN7SL107P)</a>                  | <a href="#">RG</a> | <a href="#">Homo sapiens</a> |
| RN7SL118P            | <a href="#">RNA, 7SL, cytoplasmic 118, pseudogene(RN7SL118P)</a>                  | <a href="#">RG</a> | <a href="#">Homo sapiens</a> |
| RN7SL181P            | <a href="#">RNA, 7SL, cytoplasmic 181, pseudogene(RN7SL181P)</a>                  | <a href="#">RG</a> | <a href="#">Homo sapiens</a> |
| RNF139-AS1           | <a href="#">RNF139 antisense RNA 1 (head to head)(RNF139-AS1)</a>                 | <a href="#">RG</a> | <a href="#">Homo sapiens</a> |
| RNF26                | <a href="#">ring finger protein 26(RNF26)</a>                                     | <a href="#">RG</a> | <a href="#">Homo</a>         |



| OFFICIAL_GENE_SYMBOL | Gene Name                                                            | Related Genes      | Species                      |
|----------------------|----------------------------------------------------------------------|--------------------|------------------------------|
|                      |                                                                      |                    | <a href="#">sapiens</a>      |
| RNU1-11P             | <a href="#">RNA, U1 small nuclear 11, pseudogene(RNU1-11P)</a>       | <a href="#">RG</a> | <a href="#">Homo sapiens</a> |
| RNU1-42P             | <a href="#">RNA, U1 small nuclear 42, pseudogene(RNU1-42P)</a>       | <a href="#">RG</a> | <a href="#">Homo sapiens</a> |
| RNU1-77P             | <a href="#">RNA, U1 small nuclear 77, pseudogene(RNU1-77P)</a>       | <a href="#">RG</a> | <a href="#">Homo sapiens</a> |
| RNU11                | <a href="#">RNA, U11 small nuclear(RNU11)</a>                        | <a href="#">RG</a> | <a href="#">Homo sapiens</a> |
| RNU12                | <a href="#">RNA, U12 small nuclear(RNU12)</a>                        | <a href="#">RG</a> | <a href="#">Homo sapiens</a> |
| RNU4-2               | <a href="#">RNA, U4 small nuclear 2(RNU4-2)</a>                      | <a href="#">RG</a> | <a href="#">Homo sapiens</a> |
| RNU5A-1              | <a href="#">RNA, U5A small nuclear 1(RNU5A-1)</a>                    | <a href="#">RG</a> | <a href="#">Homo sapiens</a> |
| RNU5B-1              | <a href="#">RNA, U5B small nuclear 1(RNU5B-1)</a>                    | <a href="#">RG</a> | <a href="#">Homo sapiens</a> |
| RNU5E-1              | <a href="#">RNA, U5E small nuclear 1(RNU5E-1)</a>                    | <a href="#">RG</a> | <a href="#">Homo sapiens</a> |
| RNVU1-17             | <a href="#">RNA, variant U1 small nuclear 17(RNVU1-17)</a>           | <a href="#">RG</a> | <a href="#">Homo sapiens</a> |
| RNVU1-6              | <a href="#">RNA, variant U1 small nuclear 6(RNVU1-6)</a>             | <a href="#">RG</a> | <a href="#">Homo sapiens</a> |
| RNY1                 | <a href="#">RNA, Ro-associated Y1(RNY1)</a>                          | <a href="#">RG</a> | <a href="#">Homo sapiens</a> |
| RNY1P13              | <a href="#">RNA, Ro-associated Y1 pseudogene 13(RNY1P13)</a>         | <a href="#">RG</a> | <a href="#">Homo sapiens</a> |
| RNY3                 | <a href="#">RNA, Ro-associated Y3(RNY3)</a>                          | <a href="#">RG</a> | <a href="#">Homo sapiens</a> |
| RORB                 | <a href="#">RAR related orphan receptor B(RORB)</a>                  | <a href="#">RG</a> | <a href="#">Homo sapiens</a> |
| RPL28                | <a href="#">ribosomal protein L28(RPL28)</a>                         | <a href="#">RG</a> | <a href="#">Homo sapiens</a> |
| RPS24P8              | <a href="#">ribosomal protein S24 pseudogene 8(RPS24P8)</a>          | <a href="#">RG</a> | <a href="#">Homo sapiens</a> |
| RPS28                | <a href="#">ribosomal protein S28(RPS28)</a>                         | <a href="#">RG</a> | <a href="#">Homo sapiens</a> |
| RPS6P25              | <a href="#">ribosomal protein S6 pseudogene 25(RPS6P25)</a>          | <a href="#">RG</a> | <a href="#">Homo sapiens</a> |
| RRM2                 | <a href="#">ribonucleotide reductase regulatory subunit M2(RRM2)</a> | <a href="#">RG</a> | <a href="#">Homo sapiens</a> |
| RRS1-AS1             | <a href="#">RRS1 antisense RNA 1 (head to head)(RRS1-AS1)</a>        | <a href="#">RG</a> | <a href="#">Homo sapiens</a> |
| RSBN1                | <a href="#">round spermatid basic protein 1(RSBN1)</a>               | <a href="#">RG</a> | <a href="#">Homo sapiens</a> |



| OFFICIAL_GENE_SYMBOL | Gene Name                                                                     | Related Genes      | Species                      |
|----------------------|-------------------------------------------------------------------------------|--------------------|------------------------------|
| RUNDC3B              | <a href="#">RUN domain containing 3B(RUNDC3B)</a>                             | <a href="#">RG</a> | <a href="#">Homo sapiens</a> |
| RYR1                 | <a href="#">ryanodine receptor 1(RYR1)</a>                                    | <a href="#">RG</a> | <a href="#">Homo sapiens</a> |
| SALL1                | <a href="#">spalt like transcription factor 1(SALL1)</a>                      | <a href="#">RG</a> | <a href="#">Homo sapiens</a> |
| SAPCD2               | <a href="#">suppressor APC domain containing 2(SAPCD2)</a>                    | <a href="#">RG</a> | <a href="#">Homo sapiens</a> |
| SCARNA12             | <a href="#">small Cajal body-specific RNA 12(SCARNA12)</a>                    | <a href="#">RG</a> | <a href="#">Homo sapiens</a> |
| SCARNA8              | <a href="#">small Cajal body-specific RNA 8(SCARNA8)</a>                      | <a href="#">RG</a> | <a href="#">Homo sapiens</a> |
| SELENBP1             | <a href="#">selenium binding protein 1(SELENBP1)</a>                          | <a href="#">RG</a> | <a href="#">Homo sapiens</a> |
| SETP14               | <a href="#">SET pseudogene 14(SETP14)</a>                                     | <a href="#">RG</a> | <a href="#">Homo sapiens</a> |
| SGK1                 | <a href="#">serum/glucocorticoid regulated kinase 1(SGK1)</a>                 | <a href="#">RG</a> | <a href="#">Homo sapiens</a> |
| SKA3                 | <a href="#">spindle and kinetochore associated complex subunit 3(SKA3)</a>    | <a href="#">RG</a> | <a href="#">Homo sapiens</a> |
| SLC14A1              | <a href="#">solute carrier family 14 member 1 (Kidd blood group)(SLC14A1)</a> | <a href="#">RG</a> | <a href="#">Homo sapiens</a> |
| SLC25A17             | <a href="#">solute carrier family 25 member 17(SLC25A17)</a>                  | <a href="#">RG</a> | <a href="#">Homo sapiens</a> |
| SLC4A3               | <a href="#">solute carrier family 4 member 3(SLC4A3)</a>                      | <a href="#">RG</a> | <a href="#">Homo sapiens</a> |
| SMAD7                | <a href="#">SMAD family member 7(SMAD7)</a>                                   | <a href="#">RG</a> | <a href="#">Homo sapiens</a> |
| SNHG25               | <a href="#">small nucleolar RNA host gene 25(SNHG25)</a>                      | <a href="#">RG</a> | <a href="#">Homo sapiens</a> |
| SNORA28              | <a href="#">small nucleolar RNA, H/ACA box 28(SNORA28)</a>                    | <a href="#">RG</a> | <a href="#">Homo sapiens</a> |
| SNORA38              | <a href="#">small nucleolar RNA, H/ACA box 38(SNORA38)</a>                    | <a href="#">RG</a> | <a href="#">Homo sapiens</a> |
| SNORA53              | <a href="#">small nucleolar RNA, H/ACA box 53(SNORA53)</a>                    | <a href="#">RG</a> | <a href="#">Homo sapiens</a> |
| SNORA66              | <a href="#">small nucleolar RNA, H/ACA box 66(SNORA66)</a>                    | <a href="#">RG</a> | <a href="#">Homo sapiens</a> |
| SNORA71A             | <a href="#">small nucleolar RNA, H/ACA box 71A(SNORA71A)</a>                  | <a href="#">RG</a> | <a href="#">Homo sapiens</a> |
| SNORD14E             | <a href="#">small nucleolar RNA, C/D box 14E(SNORD14E)</a>                    | <a href="#">RG</a> | <a href="#">Homo sapiens</a> |
| SNORD17              | <a href="#">small nucleolar RNA, C/D box 17(SNORD17)</a>                      | <a href="#">RG</a> | <a href="#">Homo sapiens</a> |
| SNORD3A              | <a href="#">small nucleolar RNA, C/D box</a>                                  | <a href="#">RG</a> | <a href="#">Homo</a>         |

| OFFICIAL_GENE_SYMBOL | Gene Name                                                          | Related Genes      | Species                      |
|----------------------|--------------------------------------------------------------------|--------------------|------------------------------|
|                      | <a href="#">3A(SNORD3A)</a>                                        |                    | <a href="#">sapiens</a>      |
| SNORD41              | <a href="#">small nucleolar RNA, C/D box 41(SNORD41)</a>           | <a href="#">RG</a> | <a href="#">Homo sapiens</a> |
| SNORD71              | <a href="#">small nucleolar RNA, C/D box 71(SNORD71)</a>           | <a href="#">RG</a> | <a href="#">Homo sapiens</a> |
| SOCS5                | <a href="#">suppressor of cytokine signaling 5(SOCS5)</a>          | <a href="#">RG</a> | <a href="#">Homo sapiens</a> |
| SORD                 | <a href="#">sorbitol dehydrogenase(SORD)</a>                       | <a href="#">RG</a> | <a href="#">Homo sapiens</a> |
| SPAG5                | <a href="#">sperm associated antigen 5(SPAG5)</a>                  | <a href="#">RG</a> | <a href="#">Homo sapiens</a> |
| SPRY4                | <a href="#">sprouty RTK signaling antagonist 4(SPRY4)</a>          | <a href="#">RG</a> | <a href="#">Homo sapiens</a> |
| STOM                 | <a href="#">stomatin(STOM)</a>                                     | <a href="#">RG</a> | <a href="#">Homo sapiens</a> |
| SYT2                 | <a href="#">synaptotagmin 2(SYT2)</a>                              | <a href="#">RG</a> | <a href="#">Homo sapiens</a> |
| TBC1D4               | <a href="#">TBC1 domain family member 4(TBC1D4)</a>                | <a href="#">RG</a> | <a href="#">Homo sapiens</a> |
| TFPI2                | <a href="#">tissue factor pathway inhibitor 2(TFPI2)</a>           | <a href="#">RG</a> | <a href="#">Homo sapiens</a> |
| TGFBI                | <a href="#">transforming growth factor beta induced(TGFBI)</a>     | <a href="#">RG</a> | <a href="#">Homo sapiens</a> |
| TIPARP               | <a href="#">TCDD inducible poly(ADP-ribose) polymerase(TIPARP)</a> | <a href="#">RG</a> | <a href="#">Homo sapiens</a> |
| TMEM97               | <a href="#">transmembrane protein 97(TMEM97)</a>                   | <a href="#">RG</a> | <a href="#">Homo sapiens</a> |
| TMPO                 | <a href="#">thymopoietin(TMPO)</a>                                 | <a href="#">RG</a> | <a href="#">Homo sapiens</a> |
| TMPO-AS1             | <a href="#">TMPO antisense RNA 1(TMPO-AS1)</a>                     | <a href="#">RG</a> | <a href="#">Homo sapiens</a> |
| TMX2                 | <a href="#">thioredoxin related transmembrane protein 2(TMX2)</a>  | <a href="#">RG</a> | <a href="#">Homo sapiens</a> |
| TNIK                 | <a href="#">TRAF2 and NCK interacting kinase(TNIK)</a>             | <a href="#">RG</a> | <a href="#">Homo sapiens</a> |
| TOP2A                | <a href="#">topoisomerase (DNA) II alpha(TOP2A)</a>                | <a href="#">RG</a> | <a href="#">Homo sapiens</a> |
| TPX2                 | <a href="#">TPX2, microtubule nucleation factor(TPX2)</a>          | <a href="#">RG</a> | <a href="#">Homo sapiens</a> |
| TRAM1                | <a href="#">translocation associated membrane protein 1(TRAM1)</a> | <a href="#">RG</a> | <a href="#">Homo sapiens</a> |
| TRIP13               | <a href="#">thyroid hormone receptor interactor 13(TRIP13)</a>     | <a href="#">RG</a> | <a href="#">Homo sapiens</a> |
| TTK                  | <a href="#">TTK protein kinase(TTK)</a>                            | <a href="#">RG</a> | <a href="#">Homo sapiens</a> |

| OFFICIAL_GENE_SYMBOL | Gene Name                                                                | Related Genes      | Species                      |
|----------------------|--------------------------------------------------------------------------|--------------------|------------------------------|
| TUBG1                | <a href="#">tubulin gamma 1(TUBG1)</a>                                   | <a href="#">RG</a> | <a href="#">Homo sapiens</a> |
| TXNDC11              | <a href="#">thioredoxin domain containing 11(TXNDC11)</a>                | <a href="#">RG</a> | <a href="#">Homo sapiens</a> |
| TXNDC12              | <a href="#">thioredoxin domain containing 12(TXNDC12)</a>                | <a href="#">RG</a> | <a href="#">Homo sapiens</a> |
| UBE2C                | <a href="#">ubiquitin conjugating enzyme E2 C(UBE2C)</a>                 | <a href="#">RG</a> | <a href="#">Homo sapiens</a> |
| UBE2QL1              | <a href="#">ubiquitin conjugating enzyme E2 Q family like 1(UBE2QL1)</a> | <a href="#">RG</a> | <a href="#">Homo sapiens</a> |
| UBE2T                | <a href="#">ubiquitin conjugating enzyme E2 T(UBE2T)</a>                 | <a href="#">RG</a> | <a href="#">Homo sapiens</a> |
| USP42                | <a href="#">ubiquitin specific peptidase 42(USP42)</a>                   | <a href="#">RG</a> | <a href="#">Homo sapiens</a> |
| UTS2                 | <a href="#">urotensin 2(UTS2)</a>                                        | <a href="#">RG</a> | <a href="#">Homo sapiens</a> |
| VMP1                 | <a href="#">vacuole membrane protein 1(VMP1)</a>                         | <a href="#">RG</a> | <a href="#">Homo sapiens</a> |
| WDR20                | <a href="#">WD repeat domain 20(WDR20)</a>                               | <a href="#">RG</a> | <a href="#">Homo sapiens</a> |
| WDR35                | <a href="#">WD repeat domain 35(WDR35)</a>                               | <a href="#">RG</a> | <a href="#">Homo sapiens</a> |
| WDR43                | <a href="#">WD repeat domain 43(WDR43)</a>                               | <a href="#">RG</a> | <a href="#">Homo sapiens</a> |
| WDR97                | <a href="#">WD repeat domain 97(WDR97)</a>                               | <a href="#">RG</a> | <a href="#">Homo sapiens</a> |
| ZBTB2                | <a href="#">zinc finger and BTB domain containing 2(ZBTB2)</a>           | <a href="#">RG</a> | <a href="#">Homo sapiens</a> |
| ZC3H12C              | <a href="#">zinc finger CCCH-type containing 12C(ZC3H12C)</a>            | <a href="#">RG</a> | <a href="#">Homo sapiens</a> |
| ZFX                  | <a href="#">zinc finger protein, X-linked(ZFX)</a>                       | <a href="#">RG</a> | <a href="#">Homo sapiens</a> |
| ZNF143               | <a href="#">zinc finger protein 143(ZNF143)</a>                          | <a href="#">RG</a> | <a href="#">Homo sapiens</a> |
| ZNF184               | <a href="#">zinc finger protein 184(ZNF184)</a>                          | <a href="#">RG</a> | <a href="#">Homo sapiens</a> |
| ZNF267               | <a href="#">zinc finger protein 267(ZNF267)</a>                          | <a href="#">RG</a> | <a href="#">Homo sapiens</a> |
| ZNF367               | <a href="#">zinc finger protein 367(ZNF367)</a>                          | <a href="#">RG</a> | <a href="#">Homo sapiens</a> |
| ZNF480               | <a href="#">zinc finger protein 480(ZNF480)</a>                          | <a href="#">RG</a> | <a href="#">Homo sapiens</a> |
| ZNF789               | <a href="#">zinc finger protein 789(ZNF789)</a>                          | <a href="#">RG</a> | <a href="#">Homo sapiens</a> |
| RP11-113I24.1        |                                                                          |                    |                              |

| <b>OFFICIAL_GENE_SYMBOL</b> | <b>Gene Name</b> | <b>Related Genes</b> | <b>Species</b> |
|-----------------------------|------------------|----------------------|----------------|
| RP11-438B23.2               |                  |                      |                |
| RP5-875O13.1                |                  |                      |                |
| RP1-34B20.21                |                  |                      |                |
| LA16c-360H6.3               |                  |                      |                |
| RP11-178H8.7                |                  |                      |                |
| RP11-334C17.5               |                  |                      |                |
| bP-21264C1.2                |                  |                      |                |
| RP11-303E16.2               |                  |                      |                |
| CH17-373J23.1               |                  |                      |                |
| AC083843.1                  |                  |                      |                |
| RP11-332M2.1                |                  |                      |                |
| FP236383.10                 |                  |                      |                |
| AL355075.1                  |                  |                      |                |
| CTD-3222D19.8               |                  |                      |                |
| RP11-481C4.2                |                  |                      |                |
| RP11-797A18.5               |                  |                      |                |
| RP11-863K10.7               |                  |                      |                |
| AC058791.1                  |                  |                      |                |
| CTD-2287O16.1               |                  |                      |                |
| RP5-1198O20.4               |                  |                      |                |
