# Supplementary material for: Defining a Characteristic Gene Expression Set Responsible for Cancer Stem Cell-Like Features in a Sub-Population of Ewing Sarcoma Cells CADO-ES1
Source: MDPI journal article supplement (doi:10.3390/ijms19123908), 2018-12-06
Supplement: s2 [file s2]

Archive with 8 entries (8 files):
- File_S1_312_SET1.xlsx
- File_S2_overview_sets.xlsx
- File_S3_DAVID_312_SET1.pdf
- File_S4_DAVID_42up_SET2.pdf
- File_S5_DAVID_46down_SET3.pdf
- File_S6_DAVID_43_oncogenes.pdf
- File_S7_network.zip
- Supplementary_Figures_Tables.pdf
