# Supplementary material for: Defining a Characteristic Gene Expression Set Responsible for Cancer Stem Cell-Like Features in a Sub-Population of Ewing Sarcoma Cells CADO-ES1
Source: MDPI journal article supplement (doi:10.3390/ijms19123908), 2018-12-06
Supplement: s2 [file s2]

## **DAVID 6.8 - Gene Functional Classification Result - SET-3 - 46 down**

**46 genes from the list of 46 are not in the output.  
0 group was identified.**

### Options

Classification Stringency: Medium

### Kappa Similarity

Similarity Term Overlap 4

Similarity Threshold 0.3

### Classification

Initial Group Membership 4

Final Group Membership 4

Multiple Linkage Threshold 0.5

0 cluster

**Gene List Report****Current Background: Homo sapiens****39 DAVID IDs of 46**

| OFFICIAL_GENE_SYMBOL | Gene Name                                                                                   | Related Genes      | Species                      |
|----------------------|---------------------------------------------------------------------------------------------|--------------------|------------------------------|
| ADM2                 | <a href="#">adrenomedullin 2(ADM2)</a>                                                      | <a href="#">RG</a> | <a href="#">Homo sapiens</a> |
| AKR1C2               | <a href="#">aldo-keto reductase family 1 member C2(AKR1C2)</a>                              | <a href="#">RG</a> | <a href="#">Homo sapiens</a> |
| AUTS2                | <a href="#">autism susceptibility candidate 2(AUTS2)</a>                                    | <a href="#">RG</a> | <a href="#">Homo sapiens</a> |
| CACNG8               | <a href="#">calcium voltage-gated channel auxiliary subunit gamma 8(CACNG8)</a>             | <a href="#">RG</a> | <a href="#">Homo sapiens</a> |
| CAPN10-AS1           | <a href="#">CAPN10 antisense RNA 1 (head to head)(CAPN10-AS1)</a>                           | <a href="#">RG</a> | <a href="#">Homo sapiens</a> |
| CAPS                 | <a href="#">calcyphosine(CAPS)</a>                                                          | <a href="#">RG</a> | <a href="#">Homo sapiens</a> |
| CCDC136              | <a href="#">coiled-coil domain containing 136(CCDC136)</a>                                  | <a href="#">RG</a> | <a href="#">Homo sapiens</a> |
| CHCHD7               | <a href="#">coiled-coil-helix-coiled-coil-helix domain containing 7(CHCHD7)</a>             | <a href="#">RG</a> | <a href="#">Homo sapiens</a> |
| DNAH8                | <a href="#">dynein axonemal heavy chain 8(DNAH8)</a>                                        | <a href="#">RG</a> | <a href="#">Homo sapiens</a> |
| ELMO1                | <a href="#">engulfment and cell motility 1(ELMO1)</a>                                       | <a href="#">RG</a> | <a href="#">Homo sapiens</a> |
| GNB3                 | <a href="#">G protein subunit beta 3(GNB3)</a>                                              | <a href="#">RG</a> | <a href="#">Homo sapiens</a> |
| KCNQ1OT1             | <a href="#">KCNQ1 opposite strand/antisense transcript 1 (non-protein coding)(KCNQ1OT1)</a> | <a href="#">RG</a> | <a href="#">Homo sapiens</a> |
| LINC00342            | <a href="#">long intergenic non-protein coding RNA 342(LINC00342)</a>                       | <a href="#">RG</a> | <a href="#">Homo sapiens</a> |
| LINC00685            | <a href="#">long intergenic non-protein coding RNA 685(LINC00685)</a>                       | <a href="#">RG</a> | <a href="#">Homo sapiens</a> |
| LY6H                 | <a href="#">lymphocyte antigen 6 complex, locus H(LY6H)</a>                                 | <a href="#">RG</a> | <a href="#">Homo sapiens</a> |
| MIAT                 | <a href="#">myocardial infarction associated transcript (non-protein coding)(MIAT)</a>      | <a href="#">RG</a> | <a href="#">Homo sapiens</a> |
| MIR663AHG            | <a href="#">MIR663A host gene(MIR663AHG)</a>                                                | <a href="#">RG</a> | <a href="#">Homo sapiens</a> |
| MTCO2P22             | <a href="#">mitochondrially encoded cytochrome c oxidase II pseudogene 22(MTCO2P22)</a>     | <a href="#">RG</a> | <a href="#">Homo sapiens</a> |
| MTRNR2L13            | <a href="#">MT-RNR2-like 13(MTRNR2L13)</a>                                                  | <a href="#">RG</a> | <a href="#">Homo sapiens</a> |
| MUC19                | <a href="#">mucin 19, oligomeric(MUC19)</a>                                                 | <a href="#">RG</a> | <a href="#">Homo sapiens</a> |

| OFFICIAL_GENE_SYMBOL | Gene Name                                                                             | Related Genes      | Species                      |
|----------------------|---------------------------------------------------------------------------------------|--------------------|------------------------------|
| NACAD                | <a href="#">NAC alpha domain containing(NACAD)</a>                                    | <a href="#">RG</a> | <a href="#">Homo sapiens</a> |
| NCOR2                | <a href="#">nuclear receptor corepressor 2(NCOR2)</a>                                 | <a href="#">RG</a> | <a href="#">Homo sapiens</a> |
| NPW                  | <a href="#">neuropeptide W(NPW)</a>                                                   | <a href="#">RG</a> | <a href="#">Homo sapiens</a> |
| OBSCN                | <a href="#">obscurin, cytoskeletal calmodulin and titin-interacting RhoGEF(OBSCN)</a> | <a href="#">RG</a> | <a href="#">Homo sapiens</a> |
| PDZD7                | <a href="#">PDZ domain containing 7(PDZD7)</a>                                        | <a href="#">RG</a> | <a href="#">Homo sapiens</a> |
| PGM5P2               | <a href="#">phosphoglucomutase 5 pseudogene 2(PGM5P2)</a>                             | <a href="#">RG</a> | <a href="#">Homo sapiens</a> |
| RALGAPA2             | <a href="#">Ral GTPase activating protein catalytic alpha subunit 2(RALGAPA2)</a>     | <a href="#">RG</a> | <a href="#">Homo sapiens</a> |
| RNF139-AS1           | <a href="#">RNF139 antisense RNA 1 (head to head)(RNF139-AS1)</a>                     | <a href="#">RG</a> | <a href="#">Homo sapiens</a> |
| RORB                 | <a href="#">RAR related orphan receptor B(RORB)</a>                                   | <a href="#">RG</a> | <a href="#">Homo sapiens</a> |
| RPL28                | <a href="#">ribosomal protein L28(RPL28)</a>                                          | <a href="#">RG</a> | <a href="#">Homo sapiens</a> |
| RPS6P25              | <a href="#">ribosomal protein S6 pseudogene 25(RPS6P25)</a>                           | <a href="#">RG</a> | <a href="#">Homo sapiens</a> |
| RRS1-AS1             | <a href="#">RRS1 antisense RNA 1 (head to head)(RRS1-AS1)</a>                         | <a href="#">RG</a> | <a href="#">Homo sapiens</a> |
| RYR1                 | <a href="#">ryanodine receptor 1(RYR1)</a>                                            | <a href="#">RG</a> | <a href="#">Homo sapiens</a> |
| SELENBP1             | <a href="#">selenium binding protein 1(SELENBP1)</a>                                  | <a href="#">RG</a> | <a href="#">Homo sapiens</a> |
| SLC4A3               | <a href="#">solute carrier family 4 member 3(SLC4A3)</a>                              | <a href="#">RG</a> | <a href="#">Homo sapiens</a> |
| SNHG25               | <a href="#">small nucleolar RNA host gene 25(SNHG25)</a>                              | <a href="#">RG</a> | <a href="#">Homo sapiens</a> |
| SNORD41              | <a href="#">small nucleolar RNA, C/D box 41(SNORD41)</a>                              | <a href="#">RG</a> | <a href="#">Homo sapiens</a> |
| SYT2                 | <a href="#">synaptotagmin 2(SYT2)</a>                                                 | <a href="#">RG</a> | <a href="#">Homo sapiens</a> |
| ZNF789               | <a href="#">zinc finger protein 789(ZNF789)</a>                                       | <a href="#">RG</a> | <a href="#">Homo sapiens</a> |
| CTD-3222D19.8        |                                                                                       |                    |                              |
| RP11-438B23.2        |                                                                                       |                    |                              |
| RP11-178H8.7         |                                                                                       |                    |                              |
| bP-21264C1.2         |                                                                                       |                    |                              |
| RP11-797A18.5        |                                                                                       |                    |                              |
| RP11-334C17.5        |                                                                                       |                    |                              |
| RP11-286N22.8        |                                                                                       |                    |                              |
