# Supplementary material for: Defining a Characteristic Gene Expression Set Responsible for Cancer Stem Cell-Like Features in a Sub-Population of Ewing Sarcoma Cells CADO-ES1
Source: MDPI journal article supplement (doi:10.3390/ijms19123908), 2018-12-06
Supplement: s2 [file s2 › File_S1_312_SET1.xlsx]

## Sheet: File_S1_312_SET1
genename	baseMean	log2FoldChange	lfcSE	stat	pvalue	padj
ABCB1	3542.39	0.925608	0.19616	4.71864	2.3743e-06	0.00140597
AC058791.1	1132.14	0.541267	0.148031	3.65643	0.000255748	0.0634927
AC083843.1	804.69	0.501593	0.140226	3.57704	0.000347512	0.0534082
ACTL6A	2695.15	0.538279	0.16877	3.18942	0.00142561	0.0986612
ADM2	162.319	-0.725413	0.217824	-3.33028	0.000867597	0.0746739
AKR1C2	14947.8	-0.491579	0.137784	-3.56775	0.000360059	0.0765521
AL355075.1	339.645	0.693358	0.207568	3.34039	0.000836618	0.0737522
ANK3	792.384	0.608227	0.177299	3.43052	0.000602424	0.0675627
APOLD1	636.05	0.479732	0.133925	3.58209	0.000340853	0.0533927
ARL6IP1	10788	0.513602	0.161411	3.18196	0.00146283	0.099263
ASPM	14258.6	0.530063	0.141235	3.75307	0.000174681	0.0358633
ASS1	449.411	-0.807438	0.20623	-3.91523	9.03172e-05	0.0201844
ATAD3C	177.641	-0.752006	0.221494	-3.39516	0.000685893	0.0692656
ATF1	873.229	0.577885	0.173176	3.33699	0.000846924	0.0737522
ATG3	3984.98	0.567794	0.15703	3.61582	0.000299397	0.0481188
ATHL1	256.333	-0.707188	0.203159	-3.48096	0.000499614	0.0626232
ATP11B	8453.69	0.856436	0.157775	5.4282	5.69267e-08	0.000105343
AURKA	3469.52	0.936758	0.160614	5.83235	5.46533e-09	1.34848e-05
AUTS2	574.65	-0.621533	0.188677	-3.29416	0.000987174	0.0798586
BCYRN1	8598.91	-0.698583	0.191896	-3.64042	0.000272196	0.0447732
bP-21264C1.2	210.944	-0.707976	0.216177	-3.27498	0.0010567	0.0823468
BRIX1	2447.57	0.546983	0.164415	3.32685	0.000878324	0.0747282
BUB1	4378.44	0.884104	0.162379	5.44469	5.1897e-08	0.000105343
BUB1B	2802.05	0.616547	0.159391	3.86815	0.000109664	0.0231923
C4orf48	204.542	-0.770649	0.220388	-3.49678	0.000470902	0.0616923
CACNG8	267.114	-0.695466	0.20684	-3.36234	0.000772849	0.0737522
CAPN10-AS1	183.696	-0.736143	0.215465	-3.41653	0.000634251	0.0683962
CAV1	17062.1	0.555101	0.160241	3.46416	0.000531895	0.0629934
CCNA2	4118.21	0.887819	0.168251	5.27676	1.31485e-07	0.00017307
CCNB1	8098.55	1.04221	0.158568	6.57264	4.94297e-11	3.65879e-07
CCNB2	3213.43	0.756688	0.164745	4.59308	4.36748e-06	0.00239467
CDC20	2904.15	0.926466	0.179328	5.16632	2.38743e-07	0.000235623
CDC25C	774.567	0.67164	0.174893	3.84029	0.000122891	0.0243503
CDCA2	2538.66	0.506994	0.135548	3.74033	0.000183777	0.0358633
CDCA3	878.603	0.753	0.179385	4.19767	2.69669e-05	0.00867867
CDCA8	2130.01	0.575013	0.159342	3.60867	0.000307768	0.0484703
CDH17	419.651	-0.699413	0.218668	-3.19851	0.00138141	0.0983194
CDK1	6762.03	0.715982	0.178854	4.00316	6.25013e-05	0.0156825
CDK6	674.027	0.74186	0.200981	3.6912	0.000223196	0.0387298
CDKN2C	1113.22	0.564156	0.17009	3.3168	0.000910533	0.0765882
CDKN3	3216.58	0.872782	0.165775	5.26487	1.40289e-07	0.00017307
CENPA	952.907	0.590717	0.179424	3.2923	0.00099372	0.0799513
CENPE	3853.44	0.49854	0.132352	3.76677	0.000165376	0.0458869
CEP55	2682.95	0.736657	0.1691	4.35634	1.32258e-05	0.00543874
CEP85	2679.45	0.535605	0.165738	3.23164	0.00123081	0.0902023
CH17-373J23.1	199.289	0.831363	0.219854	3.78143	0.000155929	0.0288547
CHCHD7	3482.82	-0.393726	0.116393	-3.38272	0.000717711	0.0864812
CKAP2L	2830.68	0.469485	0.13496	3.4787	0.000503855	0.0934062
CKS2	6478.99	0.849763	0.168464	5.04419	4.55446e-07	0.000396613
CLIP3	727.441	-0.667474	0.199993	-3.33749	0.00084539	0.0737522
COPS3	4256.83	0.524217	0.162171	3.2325	0.00122712	0.0902023
CRIM1	1693.95	0.577812	0.162343	3.55921	0.000371969	0.0535092
CSE1L	13128.3	0.561981	0.164047	3.42574	0.000613128	0.0681484
CSRNP2	1633.84	0.424599	0.125327	3.38793	0.000704222	0.0855873
CTD-2287O16.1	1225.52	0.724612	0.170297	4.25498	2.09064e-05	0.00736901
CTD-3222D19.8	109.741	-0.920196	0.220995	-4.16388	3.12879e-05	0.00945276
CTGF	2971.17	0.77447	0.160494	4.82553	1.39632e-06	0.000898746
CTTNBP2	460.644	0.485454	0.14605	3.32389	0.000887703	0.0995813
CXCL1	976.052	0.733396	0.148004	4.95525	7.2239e-07	0.000730181
CYR61	1826.01	0.570249	0.174576	3.26647	0.00108897	0.0839643
DCLK1	2431.02	-0.555195	0.166019	-3.34417	0.000825289	0.0737522
DDX21	10884.4	0.518865	0.160522	3.23237	0.00122768	0.0902023
DEPDC1	3697.61	0.58996	0.173075	3.4087	0.00065273	0.0683962
DHRS11	342.313	-0.541766	0.162916	-3.32543	0.000882814	0.0995813
DIMT1	925.661	0.62002	0.168065	3.68917	0.000224991	0.0387298
DLEU2	643.419	0.563672	0.176515	3.19333	0.00140641	0.0983727
DLGAP5	3938.01	0.767783	0.165233	4.64668	3.37314e-06	0.00192061
DNAH8	163.981	-0.783988	0.219406	-3.57322	0.000352614	0.0527283
DNAJC8	3485.53	0.528906	0.157763	3.35253	0.000800768	0.0737522
DPYSL3	405.524	-0.542058	0.148383	-3.65311	0.000259086	0.0445438
DUSP1	1189.44	0.938071	0.176957	5.30111	1.151e-07	0.000170393
E2F5	2181.63	0.568847	0.171136	3.32394	0.000887557	0.0750822
EBLN2	171.424	0.741088	0.221434	3.34677	0.000817599	0.0737522
EEF1A1P5	643.088	0.932858	0.203444	4.58533	4.53279e-06	0.00239655
ELMO1	206.684	-0.760038	0.220122	-3.45281	0.000554789	0.06467
ENPP2	22658.4	0.602606	0.175386	3.43589	0.000590608	0.0672566
EPC1	3333.85	0.63426	0.150178	4.22338	2.40662e-05	0.0106027
ERAP1	5375.79	0.777484	0.15862	4.90156	9.50782e-07	0.000670256
ERCC6L	907.556	0.567201	0.177455	3.19631	0.00139198	0.0983727
FABP4	3994.52	1.05184	0.202314	5.19903	2.00331e-07	0.000211836
FABP5	4643.26	0.571568	0.176428	3.23967	0.00119668	0.0902023
FAM64A	916.14	0.61454	0.183796	3.3436	0.000826982	0.0737522
FAM72A	167.931	0.583595	0.16852	3.46305	0.000534086	0.0690784
FAM83D	1913.82	0.60405	0.187736	3.21756	0.00129288	0.0938227
FOPNL	2240.87	0.55498	0.159	3.49045	0.000482216	0.0626204
FOS	4136.07	1.10939	0.172592	6.42781	1.29459e-10	4.79126e-07
FOSB	1280.79	0.764175	0.143487	5.32573	1.00546e-07	0.000177853
FOSL2	1667.25	0.50114	0.129741	3.86262	0.000112177	0.028754
FOXO1	712.757	0.500786	0.144223	3.47229	0.00051603	0.0680899
FP236383.10	287.167	-0.902286	0.216425	-4.16905	3.05869e-05	0.0094335
FTH1	4710.64	-0.718416	0.183621	-3.91249	9.13508e-05	0.0201844
GAS2L3	1738.77	0.507156	0.142228	3.5658	0.000362742	0.0544035
GNB3	139.193	-0.707487	0.218712	-3.23478	0.00121736	0.0902023
GPSM2	2413.94	0.455299	0.128893	3.53238	0.000411842	0.0592464
HDAC9	544.74	0.647694	0.184854	3.50381	0.000458647	0.0606851
HES1	4017.04	0.537477	0.152101	3.53369	0.000409805	0.0592464
HIST1H1C	1580.36	0.580146	0.146672	3.9554	7.64065e-05	0.0245734
HIST1H2AE	2636.51	0.735096	0.209624	3.50674	0.00045363	0.0864453
HIST1H2AG	2722.75	0.76601	0.212803	3.59961	0.000318693	0.0716634
HIST1H2AK	203.298	0.827477	0.218545	3.78631	0.000152904	0.028653
HIST1H2AL	389.875	0.807532	0.160269	5.03862	4.68912e-07	0.000510428
HIST1H2BB	452.544	0.703558	0.160517	4.38308	1.17014e-05	0.00719313
HIST1H2BC	1674.86	0.773414	0.147146	5.2561	1.47145e-07	0.000189296
HIST1H2BF	739.913	0.553416	0.159686	3.46565	0.000528954	0.0935654
HIST1H2BG	1999.62	0.5495	0.154094	3.56602	0.000362447	0.0765521
HIST1H2BH	445.277	0.60611	0.160455	3.77744	0.000158447	0.0448491
HIST1H2BI	400.608	0.651886	0.160497	4.06168	4.87217e-05	0.0168161
HIST1H2BL	637.868	0.57392	0.160192	3.58269	0.000340073	0.075852
HIST1H2BN	493.697	0.557013	0.160359	3.47355	0.000513621	0.0934062
HIST1H3B	4421.79	1.05621	0.145398	7.26422	3.75194e-13	1.76979e-09
HIST1H3C	633.284	0.778321	0.160455	4.8507	1.23026e-06	0.00102408
HIST1H3G	2295.81	0.809377	0.20431	3.96152	7.44745e-05	0.0183174
HIST1H4D	1429.61	0.644513	0.151805	4.24567	2.17938e-05	0.0110145
HIST1H4H	2663.22	0.570856	0.143701	3.97253	7.11123e-05	0.0234026
HIST2H2AB	497.963	0.905098	0.158106	5.72463	1.03662e-08	2.44486e-05
HIST2H2AC	425.077	0.614278	0.160399	3.82969	0.000128306	0.0386309
HJURP	2615.11	0.468848	0.13987	3.35202	0.000802231	0.0950407
HMGB2	22039.3	0.550531	0.155602	3.53807	0.000403062	0.0562918
HMMR	2942.64	0.894555	0.167312	5.34663	8.9607e-08	0.000147394
HSP90AA1	42956.4	0.604688	0.177302	3.4105	0.000648432	0.0683962
HSPH1	6002.37	0.571246	0.173112	3.29986	0.000967336	0.0798193
HYLS1	1381.45	0.584666	0.135577	4.31243	1.61473e-05	0.00784979
ID1	369.053	0.917184	0.201974	4.5411	5.59627e-06	0.00276157
ID2	15240.3	0.514508	0.13742	3.74406	0.00018107	0.0358633
ISG15	337.138	-0.717331	0.209495	-3.42409	0.000616852	0.0681484
JPH1	1162.3	0.611798	0.191924	3.18771	0.00143406	0.0987435
JUN	699.056	1.17636	0.181317	6.4879	8.70391e-11	4.29509e-07
KBTBD2	2927.62	0.429251	0.11486	3.73715	0.000186119	0.0358633
KBTBD8	450.287	0.628985	0.187989	3.34587	0.00082026	0.0737522
KCNQ1OT1	4624.37	-0.572115	0.171356	-3.33874	0.000841597	0.0737522
KIF14	4500.88	0.445573	0.130917	3.40349	0.000665315	0.0823049
KIF18A	1441.34	0.565246	0.151366	3.73429	0.000188246	0.0358633
KIF20A	2053.07	0.957715	0.160016	5.98512	2.16227e-09	6.40204e-06
KIF23	3447.66	0.646743	0.167992	3.84985	0.000118192	0.0243015
KIF2C	3709.68	0.610587	0.164248	3.71747	0.000201228	0.035464
KLF6	5964.42	0.558358	0.144007	3.87731	0.00010562	0.028754
KNSTRN	1865.15	0.756921	0.17643	4.29021	1.78506e-05	0.00644539
KPNA2	11229.2	0.773442	0.160081	4.83158	1.35454e-06	0.000898746
LA16c-360H6.3	7270.55	-0.523086	0.134446	-3.89069	9.99582e-05	0.0307502
LDHA	29413	0.546212	0.169423	3.22395	0.00126437	0.0922057
LIN9	1955.69	0.70087	0.178902	3.91763	8.94247e-05	0.0201844
LINC00342	146.689	-0.768077	0.217301	-3.53462	0.000408355	0.056498
LINC00685	110.596	-0.74385	0.221475	-3.35862	0.000783334	0.0737522
LMO7	2036.89	0.673978	0.171739	3.92444	8.69334e-05	0.0201088
LRIG3	365.126	0.76873	0.20437	3.76146	0.000168926	0.0308738
LRP1	6019.82	-0.5832	0.169365	-3.44346	0.00057433	0.06591
LUZP1	2110.51	0.492928	0.148095	3.32846	0.000873288	0.0995813
LY6H	237.341	-0.721604	0.213512	-3.37969	0.000725679	0.0711454
MAD2L1	5320.02	0.655068	0.168118	3.89648	9.75993e-05	0.0212479
MAPRE2	400.088	0.693271	0.188121	3.68524	0.000228484	0.0388791
MEG3	6295.65	-0.572255	0.173703	-3.29444	0.000986174	0.0798586
MIAT	1176.45	-0.611433	0.181473	-3.36927	0.000753678	0.0729245
MIR222HG	883.906	0.626095	0.165513	3.78277	0.000155095	0.0358448
MIR663AHG	1423.03	-0.886885	0.169487	-5.23276	1.66996e-07	0.00019017
MKX	1509.74	1.59932	0.173293	9.22903	2.73083e-20	4.04272e-16
MLC1	33.7158	-0.688925	0.206979	-3.32848	0.000873224	0.0747237
MPP4	183.511	0.760214	0.218791	3.47461	0.000511599	0.0626232
MSL2	1551.49	0.515826	0.145416	3.54725	0.000389275	0.0571666
MTCO2P22	571.743	-0.808139	0.195446	-4.13485	3.55183e-05	0.0105163
MTND1P23	9302.53	0.531179	0.127056	4.18068	2.90635e-05	0.014182
MTND2P28	26707.9	0.546503	0.125462	4.35593	1.32502e-05	0.00750016
MTND5P11	7761.19	0.51543	0.131447	3.92119	8.81114e-05	0.0277081
MTRNR2L13	1638.97	-0.799393	0.199561	-4.00577	6.1817e-05	0.0156825
MUC19	381.5	-0.824798	0.229199	-3.59861	0.000319926	0.0716634
MYC	6460.68	0.732368	0.169919	4.3101	1.63181e-05	0.00619418
NBPF10	134.033	0.765669	0.170455	4.49193	7.05819e-06	0.00368542
NCAPD3	4371.27	0.561794	0.173344	3.24091	0.00119147	0.0902023
NCAPH	2599.21	0.701896	0.173232	4.05176	5.08336e-05	0.0134382
NCOR2	823.055	-0.601779	0.182416	-3.29894	0.000970513	0.0798193
NDC1	4774.5	0.557771	0.163778	3.40564	0.00066008	0.0683962
NEAT1	93825.5	-0.663346	0.176734	-3.75337	0.000174474	0.031499
NEK2	2407.26	0.880531	0.172075	5.11713	3.10218e-07	0.000287029
NOP16	898.889	0.595046	0.175988	3.38118	0.000721754	0.0711454
NPAT	1872.11	0.484116	0.12885	3.75721	0.000171816	0.0358633
NPM1P5	52.1793	0.736898	0.215622	3.41755	0.000631871	0.0683962
NPW	177.951	-0.894577	0.211779	-4.22411	2.39888e-05	0.00807113
NRIP1	623.199	-0.703212	0.196606	-3.57677	0.000347868	0.0525494
NRXN3	505.855	-0.683269	0.189902	-3.59801	0.000320662	0.0498004
NSDHL	608.566	0.617837	0.184206	3.35405	0.000796368	0.0737522
NUF2	3137.97	0.582411	0.166235	3.50354	0.000459115	0.0606851
NUP35	1248.77	0.583805	0.169211	3.45016	0.000560255	0.064797
NUSAP1	7840.48	0.717755	0.160893	4.46107	8.15502e-06	0.00365839
OBSCN	865.743	-0.715377	0.194344	-3.68098	0.000232336	0.0390853
OIP5	321.86	0.749554	0.205196	3.65286	0.000259333	0.0431367
P3H2	491.57	-0.572076	0.142521	-4.01397	5.97053e-05	0.0191301
PBK	8358.61	0.599151	0.17036	3.51696	0.000436512	0.0592855
PDZD7	180.034	-0.742022	0.213471	-3.47599	0.00050897	0.0626232
PGM5P2	188.588	-0.758023	0.219501	-3.45339	0.000553579	0.06467
PLEKHF2	1916.77	0.489661	0.128611	3.80731	0.000140485	0.0330093
PLK1	3736.44	0.757677	0.175117	4.32669	1.51365e-05	0.00605622
PLXNA3	1084.12	-0.682469	0.190313	-3.58603	0.000335756	0.0512426
PNPT1	2130.09	0.55153	0.163873	3.3656	0.000763766	0.0734207
POPDC3	368.835	0.627922	0.190912	3.28906	0.00100521	0.0803567
PRC1	8858.63	0.61968	0.154733	4.00485	6.2058e-05	0.0156825
PRPS1	1980.41	0.621676	0.184092	3.37699	0.000732831	0.0713739
PSRC1	972.704	0.606538	0.174646	3.47295	0.000514773	0.0626232
PTPRD	449.388	-0.720077	0.211363	-3.40682	0.000657236	0.0683962
PWWP2A	3938.81	0.526419	0.1306	4.03078	5.55924e-05	0.0186605
RACGAP1	5425.99	0.595138	0.153126	3.88659	0.000101661	0.0218114
RALGAPA2	610.443	-0.590279	0.176747	-3.33968	0.000838741	0.0737522
RANGAP1	2423.79	0.65382	0.195476	3.34476	0.000823525	0.0737522
RHOBTB3	22329.3	0.370656	0.108908	3.4034	0.000665538	0.0823049
RN7SKP160	989.36	0.889407	0.196661	4.52253	6.11044e-06	0.00282684
RN7SKP9	158.389	-0.77263	0.217277	-3.55597	0.000376587	0.0536057
RN7SL107P	146.884	0.76889	0.221443	3.47218	0.000516258	0.0626232
RN7SL118P	301.171	-0.786309	0.220867	-3.5601	0.000370718	0.0535092
RN7SL181P	257.619	-0.871915	0.202976	-4.29566	1.74175e-05	0.00644539
RNF139-AS1	398.231	-0.639029	0.199484	-3.2034	0.00135815	0.0971305
RNF26	1027.15	0.503766	0.14665	3.43516	0.000592201	0.0997647
RNU1-11P	838.492	-0.854265	0.20446	-4.17815	2.93885e-05	0.00925675
RNU1-42P	175.592	-0.670752	0.170427	-3.93572	8.29462e-05	0.024362
RNU1-77P	210.529	-0.703493	0.170106	-4.13561	3.54012e-05	0.0142596
RNU11	1232.76	-0.727614	0.172523	-4.2175	2.47029e-05	0.0081267
RNU12	955.347	-0.586105	0.182592	-3.20992	0.00132774	0.0954168
RNU4-2	7233.08	-0.698719	0.15746	-4.43744	9.1034e-06	0.00394479
RNU5A-1	28332.1	-0.87687	0.175117	-5.00735	5.51846e-07	0.000453862
RNU5B-1	47052.7	-0.843697	0.184387	-4.57569	4.7465e-06	0.002423
RNU5E-1	37591.7	-0.691487	0.181202	-3.81612	0.000135569	0.0260645
RNVU1-17	852.605	-0.578536	0.164259	-3.52208	0.000428167	0.0597653
RNVU1-6	133.689	1.0029	0.221395	4.5299	5.90117e-06	0.0028181
RNY1	15808.2	0.766136	0.172856	4.43223	9.32637e-06	0.00394479
RNY1P13	11447.5	0.501437	0.121456	4.12854	3.6508e-05	0.0148101
RNY3	6541.16	0.713885	0.20051	3.56036	0.000370353	0.0799891
RORB	947.352	-0.772679	0.189663	-4.07395	4.62222e-05	0.0126717
RP1-34B20.21	537.069	0.697495	0.160502	4.34572	1.38818e-05	0.00755544
RP11-113I24.1	294.045	-0.707652	0.221451	-3.19553	0.00139575	0.0983727
RP11-178H8.7	160.46	-0.827936	0.215645	-3.83934	0.000123363	0.0243503
RP11-303E16.2	411.078	0.613288	0.186532	3.28783	0.00100962	0.0803567
RP11-332M2.1	103.598	0.704336	0.221228	3.18376	0.00145376	0.099263
RP11-334C17.5	88.458	-0.753413	0.221241	-3.4054	0.000660676	0.0683962
RP11-438B23.2	519.141	-0.891741	0.22766	-3.91699	8.96599e-05	0.0365176
RP11-481C4.2	148.296	0.585424	0.170058	3.4425	0.000576364	0.0732034
RP11-797A18.5	274.518	-0.678021	0.209696	-3.23336	0.00122345	0.0902023
RP11-863K10.7	96.932	0.704233	0.220566	3.19285	0.00140874	0.0983727
RP5-1198O20.4	75.8568	-0.717762	0.218609	-3.28332	0.00102592	0.0812177
RP5-875O13.1	376.077	-0.660335	0.170898	-3.86391	0.000111585	0.028754
RPL28	4073.85	-0.628303	0.174715	-3.59617	0.000322942	0.0498004
RPS24P8	137.153	0.865804	0.219792	3.9392	8.17527e-05	0.0192106
RPS28	8629.21	-0.75351	0.184284	-4.08886	4.33496e-05	0.0123413
RPS6P25	64.9789	-0.734861	0.220587	-3.33139	0.000864147	0.0746739
RRM2	14846.7	0.577293	0.174872	3.30124	0.000962592	0.0798193
RRS1-AS1	44.7305	-0.747228	0.21547	-3.4679	0.000524539	0.0626232
RSBN1	3677.78	0.463215	0.132338	3.50024	0.00046484	0.0901089
RUNDC3B	1982.77	0.790077	0.186432	4.23789	2.25631e-05	0.00776799
RYR1	71.4021	-0.823696	0.220458	-3.73629	0.000186754	0.0333096
SALL1	484.242	0.581932	0.151527	3.84046	0.000122803	0.0303733
SAPCD2	887.316	0.613795	0.188366	3.25853	0.00111993	0.085461
SCARNA12	1473.08	-0.473938	0.140993	-3.36143	0.00077539	0.0926394
SCARNA8	1639.02	-0.756897	0.186152	-4.06602	4.78222e-05	0.012872
SELENBP1	5510.38	-0.593564	0.16427	-3.61333	0.000302287	0.0481188
SETP14	143.08	1.04854	0.219931	4.76758	1.86453e-06	0.00115011
SGK1	8241.88	0.568439	0.175736	3.23462	0.00121805	0.0902023
SGOL2	3138.88	0.573753	0.148018	3.87623	0.000106087	0.028754
SKA3	2887.6	0.533983	0.157295	3.39479	0.00068681	0.0692656
SLC14A1	876.885	-0.477107	0.137329	-3.47418	0.000512423	0.0680899
SLC25A17	1456.02	0.563839	0.172276	3.27288	0.00106459	0.082514
SLC4A3	218.126	-0.685115	0.210147	-3.26017	0.00111345	0.0854067
SMAD7	781.51	0.520833	0.150014	3.4719	0.000516784	0.0680899
SNHG25	668.513	-0.645432	0.190213	-3.39321	0.000690795	0.0692656
SNORA28	4198.99	-0.530042	0.127241	-4.16566	3.10447e-05	0.0146438
SNORA38	333.182	-0.853259	0.197608	-4.31794	1.57491e-05	0.0061355
SNORA53	6735.59	-0.647663	0.168153	-3.85164	0.000117331	0.0243015
SNORA66	2595.92	-0.60565	0.132599	-4.56752	4.93519e-06	0.0034919
SNORA71A	640.493	-0.669191	0.192603	-3.47445	0.000511906	0.0626232
SNORD14E	2173.78	-0.483855	0.135447	-3.57228	0.000353883	0.0765521
SNORD17	4999.36	-0.85812	0.172715	-4.96842	6.75014e-07	0.000525943
SNORD3A	20250.8	-0.674113	0.127671	-5.28006	1.29139e-07	0.000189296
SNORD41	2742.3	-0.72765	0.184377	-3.94654	7.92886e-05	0.0189321
SNORD71	496.675	-0.757875	0.185909	-4.0766	4.56988e-05	0.0126717
SOCS5	1146.82	0.577606	0.154258	3.74442	0.00018081	0.0358633
SORD	2642.68	0.666294	0.198362	3.35898	0.000782296	0.0737522
SPAG5	4499.52	0.552593	0.157439	3.50989	0.000448292	0.060332
SPRY4	10638.3	0.57672	0.135345	4.26111	2.03417e-05	0.00925089
STOM	4673.32	0.551372	0.154726	3.56355	0.000365879	0.0535092
SYT2	344.33	-0.644785	0.20264	-3.18193	0.00146299	0.099263
TBC1D4	1691.64	0.628279	0.163396	3.84512	0.000120493	0.0243503
TFPI2	93.5062	0.759773	0.221357	3.43234	0.0005984	0.0675627
TGFBI	55.8778	-0.690267	0.209508	-3.2947	0.00098526	0.0798586
TIPARP	1467.41	0.559243	0.152596	3.66485	0.00024748	0.0430737
TMEM97	3791.74	0.555049	0.163357	3.39777	0.000679364	0.0692656
TMPO	12153.7	0.548638	0.154882	3.5423	0.000396649	0.0559237
TMPO-AS1	475.41	0.67213	0.188855	3.55898	0.000372294	0.0535092
TMX2	2759.34	0.518132	0.162891	3.18085	0.00146843	0.099263
TNIK	105.537	0.609938	0.170551	3.57627	0.000348529	0.0534082
TOP2A	22889.1	0.571577	0.16475	3.46936	0.000521702	0.0626232
TPX2	6521	0.63282	0.153788	4.11487	3.87394e-05	0.011245
TRAM1	31260.5	0.620596	0.156783	3.95833	7.5477e-05	0.0183174
TRIP13	1503.94	0.629759	0.179006	3.51809	0.000434664	0.0592855
TTK	2779.36	0.579241	0.176871	3.27493	0.00105687	0.0823468
TUBG1	1297.61	0.612673	0.187007	3.2762	0.00105214	0.0823468
TXNDC11	1333.95	0.455489	0.126785	3.59262	0.000327372	0.0530493
TXNDC12	1955.45	0.530187	0.160419	3.30501	0.000949743	0.079435
U1	3222.51	-0.609633	0.178479	-3.41572	0.000636135	0.0683962
UBE2C	3309.44	0.541262	0.159545	3.39254	0.000692469	0.0692656
UBE2QL1	513.56	0.65148	0.202719	3.2137	0.00131036	0.0946269
UBE2T	4788.9	0.874805	0.178133	4.91097	9.06265e-07	0.000670256
USP42	896.185	0.485226	0.129819	3.73771	0.000185707	0.0358633
UTS2	47.0913	0.747759	0.205765	3.63405	0.000279006	0.0453891
VMP1	7348.88	0.534929	0.158207	3.3812	0.000721702	0.0711454
WDR20	778.485	0.559491	0.136876	4.08757	4.35914e-05	0.0161724
WDR35	3188.26	0.609912	0.159343	3.82767	0.000129362	0.0251984
WDR43	3334.04	0.519259	0.162813	3.1893	0.0014262	0.0986612
WDR97	78.9013	-0.73825	0.221217	-3.33722	0.000846199	0.0737522
ZBTB2	1187.18	0.649684	0.126345	5.14213	2.71634e-07	0.00035731
ZC3H12C	4079.83	0.450095	0.121723	3.69769	0.000217573	0.0388272
ZFX	3185.94	0.476065	0.122003	3.90209	9.53662e-05	0.0274382
ZNF143	1145.56	0.576816	0.166151	3.47164	0.000517284	0.0626232
ZNF184	1270.47	0.492272	0.141746	3.47291	0.000514853	0.0934062
ZNF267	1194.02	0.628219	0.184124	3.41194	0.000645031	0.0683962
ZNF367	1393.5	0.679696	0.195945	3.4688	0.000522781	0.0626232
ZNF480	1099.89	0.494574	0.133928	3.69284	0.000221763	0.0390802
ZNF789	620.77	-0.696201	0.182737	-3.80985	0.00013905	0.0263909
