# Supplementary material for: Defining a Characteristic Gene Expression Set Responsible for Cancer Stem Cell-Like Features in a Sub-Population of Ewing Sarcoma Cells CADO-ES1
Source: MDPI journal article supplement (doi:10.3390/ijms19123908), 2018-12-06
Supplement: s2 [file s2 › File_S2_overview_sets.xlsx]

## Sheet: sets
	SET-1		SET-2		SET-1 oncogenes
	ABCB1		ANK3		ASS1
	AC058791.1		ATF1		ATF1
	AC083843.1		CDK6		AURKA
	ACTL6A		CH17-373J23.1		CAV1
	ADM2		CRIM1		CCNB1
	AKR1C2		CTGF		CCNB2
	AL355075.1		CYR61		CDC25C
	ANK3		DUSP1		CDH17
	APOLD1		EBLN2		CDK1
	ARL6IP1		EPC1		CDK6
	ASPM		FOS		CDKN2C
	ASS1		FOSL2		CDKN3
	ATAD3C		HIST1H1C		COPS3
	ATF1		HIST1H2BC		CTGF
	ATG3		HIST1H3C		CXCL1
	ATHL1		HIST2H2AB		DLEU2
	ATP11B		HIST2H2AC		DUSP1
	AURKA		ID1		E2F5
	AUTS2		JUN		FAM72A
	BCYRN1		KLF6		FAM83D
	bP-21264C1.2		LMO7		FOS
	BRIX1		LRIG3		FOXO1
	BUB1		LUZP1		ID1
	BUB1B		MAPRE2		ID2
	C4orf48		MIR222HG		ISG15
	CACNG8		NBPF10		JUN
	CAPN10-AS1		POPDC3		KIF14
	CAV1		RN7SKP160		KLF6
	CCNA2		RN7SL107P		LIN9
	CCNB1		RNVU1-6		LRIG3
	CCNB2		RNY3		MEG3
	CDC20		SMAD7		MYC
	CDC25C		SOCS5		NEAT1
	CDCA2		STOM		PBK
	CDCA3		TFPI2		PLK1
	CDCA8		TIPARP		PTPRD
	CDH17		TNIK		SELENBP1
	CDK1		TRAM1		SGK1
	CDK6		TXNDC11		SPRY4
	CDKN2C		TXNDC12		TFPI2
	CDKN3		VMP1		TGFBI
	CENPA		ZNF184		UBE2C
	CENPE				UBE2QL1
	CEP55
	CEP85
	CH17-373J23.1
	CHCHD7
	CKAP2L
	CKS2
	CLIP3
	COPS3
	CRIM1
	CSE1L
	CSRNP2
	CTD-2287O16.1
	CTD-3222D19.8
	CTGF
	CTTNBP2
	CXCL1
	CYR61
	DCLK1
	DDX21
	DEPDC1
	DHRS11
	DIMT1
	DLEU2
	DLGAP5
	DNAH8
	DNAJC8
	DPYSL3
	DUSP1
	E2F5
	EBLN2
	EEF1A1P5
	ELMO1
	ENPP2
	EPC1
	ERAP1
	ERCC6L
	FABP4
	FABP5
	FAM64A
	FAM72A
	FAM83D
	FOPNL
	FOS
	FOSB
	FOSL2
	FOXO1
	FP236383.10
	FTH1
	GAS2L3
	GNB3
	GPSM2
	HDAC9
	HES1
	HIST1H1C
	HIST1H2AE
	HIST1H2AG
	HIST1H2AK
	HIST1H2AL
	HIST1H2BB
	HIST1H2BC
	HIST1H2BF
	HIST1H2BG
	HIST1H2BH
	HIST1H2BI
	HIST1H2BL
	HIST1H2BN
	HIST1H3B
	HIST1H3C
	HIST1H3G
	HIST1H4D
	HIST1H4H
	HIST2H2AB
	HIST2H2AC
	HJURP
	HMGB2
	HMMR
	HSP90AA1
	HSPH1
	HYLS1
	ID1
	ID2
	ISG15
	JPH1
	JUN
	KBTBD2
	KBTBD8
	KCNQ1OT1
	KIF14
	KIF18A
	KIF20A
	KIF23
	KIF2C
	KLF6
	KNSTRN
	KPNA2
	LA16c-360H6.3
	LDHA
	LIN9
	LINC00342
	LINC00685
	LMO7
	LRIG3
	LRP1
	LUZP1
	LY6H
	MAD2L1
	MAPRE2
	MEG3
	MIAT
	MIR222HG
	MIR663AHG
	MKX
	MLC1
	MPP4
	MSL2
	MTCO2P22
	MTND1P23
	MTND2P28
	MTND5P11
	MTRNR2L13
	MUC19
	MYC
	NBPF10
	NCAPD3
	NCAPH
	NCOR2
	NDC1
	NEAT1
	NEK2
	NOP16
	NPAT
	NPM1P5
	NPW
	NRIP1
	NRXN3
	NSDHL
	NUF2
	NUP35
	NUSAP1
	OBSCN
	OIP5
	P3H2
	PBK
	PDZD7
	PGM5P2
	PLEKHF2
	PLK1
	PLXNA3
	PNPT1
	POPDC3
	PRC1
	PRPS1
	PSRC1
	PTPRD
	PWWP2A
	RACGAP1
	RALGAPA2
	RANGAP1
	RHOBTB3
	RN7SKP160
	RN7SKP9
	RN7SL107P
	RN7SL118P
	RN7SL181P
	RNF139-AS1
	RNF26
	RNU1-11P
	RNU1-42P
	RNU1-77P
	RNU11
	RNU12
	RNU4-2
	RNU5A-1
	RNU5B-1
	RNU5E-1
	RNVU1-17
	RNVU1-6
	RNY1
	RNY1P13
	RNY3
	RORB
	RP1-34B20.21
	RP11-113I24.1
	RP11-178H8.7
	RP11-303E16.2
	RP11-332M2.1
	RP11-334C17.5
	RP11-438B23.2
	RP11-481C4.2
	RP11-797A18.5
	RP11-863K10.7
	RP5-1198O20.4
	RP5-875O13.1
	RPL28
	RPS24P8
	RPS28
	RPS6P25
	RRM2
	RRS1-AS1
	RSBN1
	RUNDC3B
	RYR1
	SALL1
	SAPCD2
	SCARNA12
	SCARNA8
	SELENBP1
	SETP14
	SGK1
	SGOL2
	SKA3
	SLC14A1
	SLC25A17
	SLC4A3
	SMAD7
	SNHG25
	SNORA28
	SNORA38
	SNORA53
	SNORA66
	SNORA71A
	SNORD14E
	SNORD17
	SNORD3A
	SNORD41
	SNORD71
	SOCS5
	SORD
	SPAG5
	SPRY4
	STOM
	SYT2
	TBC1D4
	TFPI2
	TGFBI
	TIPARP
	TMEM97
	TMPO
	TMPO-AS1
	TMX2
	TNIK
	TOP2A
	TPX2
	TRAM1
	TRIP13
	TTK
	TUBG1
	TXNDC11
	TXNDC12
	U1
	UBE2C
	UBE2QL1
	UBE2T
	USP42
	UTS2
	VMP1
	WDR20
	WDR35
	WDR43
	WDR97
	ZBTB2
	ZC3H12C
	ZFX
	ZNF143
	ZNF184
	ZNF267
	ZNF367
	ZNF480
	ZNF789

## Sheet: details oncogenes
	43 genes of 312 DEGs were identified as tumor-associated genes
	cf. Table S1. The top five terms of Gene Ontology analysis for the up-regulated DEGs
	using BiNGO application.
	Among the 35 annotated up-regulated genes
	21 oncogenes
	KIF14
	ID2
	COPS3
	UBE2C
	SGK1
	E2F5
	ATF1
	FAM72A
	PBK
	FAM83D
	CDC25C
	CDK1
	MYC
	CXCL1
	CCNB2
	CDKN3
	ID1
	AURKA
	CCNB1
	FOS
	JUN
	8 tumor suppressor genes
	DLEU2
	CDKN2C
	SPRY4
	UBE2QL1
	LIN9
	TFPI2
	LRIG3
	DUSP1
	6 genes serve as both oncogenes and tumor suppressor genes
	FOXO1
	CAV1
	KLF6
	CDK6
	PLK1
	CTGF
	Among the 8 annotated down-regulated genes
	1 oncogene
	NEAT1
	6 tumor suppressor genes
	ASS1
	PTPRD
	ISG15
	TGFBI
	SELENBP1
	MEG3
	and 1 gene serves as both oncogene and tumor suppressor genes
	CDH17
