# Supplementary material for: Defining a Characteristic Gene Expression Set Responsible for Cancer Stem Cell-Like Features in a Sub-Population of Ewing Sarcoma Cells CADO-ES1
Source: MDPI journal article supplement (doi:10.3390/ijms19123908), 2018-12-06
Supplement: s2 [file s2 › File_S4_DAVID_42up_SET2.pdf]

**DAVID 6.8 - Gene Functional Classification Result - SET-2 - 42 up**

**36 genes from the list of 42 are not in the output.**  
**1 group was identified.**

**Options**

Classification Stringency: Medium

**Kappa Similarity**

Similarity Term Overlap 4

Similarity Threshold 0.3

**Classification**

Initial Group Membership 4

Final Group Membership 4

Multiple Linkage Threshold 0.5

|   | <b>Gene Group 1</b> | <b>Enrichment Score: 2.62 <u>RG</u></b> 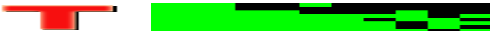 |
|---|---------------------|----------------------------------------------------------------------------------------------------------------------------|
| 1 | HIST1H2BC           | <a href="#">histone cluster 1 H2B family member c(HIST1H2BC)</a>                                                           |
| 2 | HIST2H2AB           | <a href="#">histone cluster 2 H2A family member b(HIST2H2AB)</a>                                                           |
| 3 | HIST1H1C            | <a href="#">histone cluster 1 H1 family member c(HIST1H1C)</a>                                                             |
| 4 | HIST1H3C            | <a href="#">histone cluster 1 H3 family member c(HIST1H3C)</a>                                                             |
| 5 | HIST2H2AC           | <a href="#">histone cluster 2 H2A family member c(HIST2H2AC)</a>                                                           |

**Gene List Report****Current Background: Homo sapiens****41 DAVID IDs of 42**

| OFFICIAL_GENE_SYMBOL | Gene Name                                                                  | Related Genes      | Species                      |
|----------------------|----------------------------------------------------------------------------|--------------------|------------------------------|
| ANK3                 | <a href="#">ankyrin 3(ANK3)</a>                                            | <a href="#">RG</a> | <a href="#">Homo sapiens</a> |
| ATF1                 | <a href="#">activating transcription factor 1(ATF1)</a>                    | <a href="#">RG</a> | <a href="#">Homo sapiens</a> |
| CDK6                 | <a href="#">cyclin dependent kinase 6(CDK6)</a>                            | <a href="#">RG</a> | <a href="#">Homo sapiens</a> |
| CRIM1                | <a href="#">cysteine rich transmembrane BMP regulator 1(CRIM1)</a>         | <a href="#">RG</a> | <a href="#">Homo sapiens</a> |
| CTGF                 | <a href="#">connective tissue growth factor(CTGF)</a>                      | <a href="#">RG</a> | <a href="#">Homo sapiens</a> |
| CYR61                | <a href="#">cysteine rich angiogenic inducer 61(CYR61)</a>                 | <a href="#">RG</a> | <a href="#">Homo sapiens</a> |
| DUSP1                | <a href="#">dual specificity phosphatase 1(DUSP1)</a>                      | <a href="#">RG</a> | <a href="#">Homo sapiens</a> |
| EBLN2                | <a href="#">endogenous Bornavirus-like nucleoprotein 2(EBLN2)</a>          | <a href="#">RG</a> | <a href="#">Homo sapiens</a> |
| EPC1                 | <a href="#">enhancer of polycomb homolog 1(EPC1)</a>                       | <a href="#">RG</a> | <a href="#">Homo sapiens</a> |
| FOS                  | <a href="#">Fos proto-oncogene, AP-1 transcription factor subunit(FOS)</a> | <a href="#">RG</a> | <a href="#">Homo sapiens</a> |
| FOSL2                | <a href="#">FOS like 2, AP-1 transcription factor subunit(FOSL2)</a>       | <a href="#">RG</a> | <a href="#">Homo sapiens</a> |
| HIST1H1C             | <a href="#">histone cluster 1 H1 family member c(HIST1H1C)</a>             | <a href="#">RG</a> | <a href="#">Homo sapiens</a> |
| HIST1H2BC            | <a href="#">histone cluster 1 H2B family member c(HIST1H2BC)</a>           | <a href="#">RG</a> | <a href="#">Homo sapiens</a> |
| HIST1H3C             | <a href="#">histone cluster 1 H3 family member c(HIST1H3C)</a>             | <a href="#">RG</a> | <a href="#">Homo sapiens</a> |
| HIST2H2AB            | <a href="#">histone cluster 2 H2A family member b(HIST2H2AB)</a>           | <a href="#">RG</a> | <a href="#">Homo sapiens</a> |
| HIST2H2AC            | <a href="#">histone cluster 2 H2A family member c(HIST2H2AC)</a>           | <a href="#">RG</a> | <a href="#">Homo sapiens</a> |
| ID1                  | <a href="#">inhibitor of DNA binding 1, HLH protein(ID1)</a>               | <a href="#">RG</a> | <a href="#">Homo sapiens</a> |
| JUN                  | <a href="#">Jun proto-oncogene, AP-1 transcription factor subunit(JUN)</a> | <a href="#">RG</a> | <a href="#">Homo sapiens</a> |
| KLF6                 | <a href="#">Kruppel like factor 6(KLF6)</a>                                | <a href="#">RG</a> | <a href="#">Homo sapiens</a> |
| LMO7                 | <a href="#">LIM domain 7(LMO7)</a>                                         | <a href="#">RG</a> | <a href="#">Homo sapiens</a> |
| LRIG3                | <a href="#">leucine rich repeats and</a>                                   | <a href="#">RG</a> | <a href="#">Homo</a>         |

| OFFICIAL_GENE_SYMBOL | Gene Name                                                                    | Related Genes      | Species                      |
|----------------------|------------------------------------------------------------------------------|--------------------|------------------------------|
|                      | <a href="#">immunoglobulin like domains 3(LRIG3)</a>                         |                    | <a href="#">sapiens</a>      |
| LUZP1                | <a href="#">leucine zipper protein 1(LUZP1)</a>                              | <a href="#">RG</a> | <a href="#">Homo sapiens</a> |
| MAPRE2               | <a href="#">microtubule associated protein RP/EB family member 2(MAPRE2)</a> | <a href="#">RG</a> | <a href="#">Homo sapiens</a> |
| MIR222HG             | <a href="#">MIR222 host gene(MIR222HG)</a>                                   | <a href="#">RG</a> | <a href="#">Homo sapiens</a> |
| NBPF10               | <a href="#">neuroblastoma breakpoint family member 10(NBPF10)</a>            | <a href="#">RG</a> | <a href="#">Homo sapiens</a> |
| POPDC3               | <a href="#">popeye domain containing 3(POPDC3)</a>                           | <a href="#">RG</a> | <a href="#">Homo sapiens</a> |
| RN7SKP160            | <a href="#">RNA, 7SK small nuclear pseudogene 160(RN7SKP160)</a>             | <a href="#">RG</a> | <a href="#">Homo sapiens</a> |
| RN7SL107P            | <a href="#">RNA, 7SL, cytoplasmic 107, pseudogene(RN7SL107P)</a>             | <a href="#">RG</a> | <a href="#">Homo sapiens</a> |
| RNVU1-6              | <a href="#">RNA, variant U1 small nuclear 6(RNVU1-6)</a>                     | <a href="#">RG</a> | <a href="#">Homo sapiens</a> |
| RNY3                 | <a href="#">RNA, Ro-associated Y3(RNY3)</a>                                  | <a href="#">RG</a> | <a href="#">Homo sapiens</a> |
| SMAD7                | <a href="#">SMAD family member 7(SMAD7)</a>                                  | <a href="#">RG</a> | <a href="#">Homo sapiens</a> |
| SOCS5                | <a href="#">suppressor of cytokine signaling 5(SOCS5)</a>                    | <a href="#">RG</a> | <a href="#">Homo sapiens</a> |
| STOM                 | <a href="#">stomatin(STOM)</a>                                               | <a href="#">RG</a> | <a href="#">Homo sapiens</a> |
| TFPI2                | <a href="#">tissue factor pathway inhibitor 2(TFPI2)</a>                     | <a href="#">RG</a> | <a href="#">Homo sapiens</a> |
| TIPARP               | <a href="#">TCDD inducible poly(ADP-ribose) polymerase(TIPARP)</a>           | <a href="#">RG</a> | <a href="#">Homo sapiens</a> |
| TNIK                 | <a href="#">TRAF2 and NCK interacting kinase(TNIK)</a>                       | <a href="#">RG</a> | <a href="#">Homo sapiens</a> |
| TRAM1                | <a href="#">translocation associated membrane protein 1(TRAM1)</a>           | <a href="#">RG</a> | <a href="#">Homo sapiens</a> |
| TXNDC11              | <a href="#">thioredoxin domain containing 11(TXNDC11)</a>                    | <a href="#">RG</a> | <a href="#">Homo sapiens</a> |
| TXNDC12              | <a href="#">thioredoxin domain containing 12(TXNDC12)</a>                    | <a href="#">RG</a> | <a href="#">Homo sapiens</a> |
| VMP1                 | <a href="#">vacuole membrane protein 1(VMP1)</a>                             | <a href="#">RG</a> | <a href="#">Homo sapiens</a> |
| ZNF184               | <a href="#">zinc finger protein 184(ZNF184)</a>                              | <a href="#">RG</a> | <a href="#">Homo sapiens</a> |
| CH17-373J23.1        |                                                                              |                    |                              |
