# Supplementary material for: Defining a Characteristic Gene Expression Set Responsible for Cancer Stem Cell-Like Features in a Sub-Population of Ewing Sarcoma Cells CADO-ES1
Source: MDPI journal article supplement (doi:10.3390/ijms19123908), 2018-12-06
Supplement: s2 [file s2 › File_S6_DAVID_43_oncogenes.pdf]

## **DAVID 6.8 - Gene Functional Classification Result - SET-1 - subset of the 43 oncogenes**

**43 genes from the list of 43 are not in the output.  
0 group was identified.**

### Options

Classification Stringency: Medium

### Kappa Similarity

Similarity Term Overlap 4

Similarity Threshold 0.3

### Classification

Initial Group Membership 4

Final Group Membership 4

Multiple Linkage Threshold 0.5

0 cluster

**Gene List Report**  
**Current Background: Homo sapiens**  
**43 DAVID IDs of 43**

| OFFICIAL_GENE_SYMBOL | Gene Name                                                                     | Related Genes      | Species                      |
|----------------------|-------------------------------------------------------------------------------|--------------------|------------------------------|
| ASS1                 | <a href="#">argininosuccinate synthase 1(ASS1)</a>                            | <a href="#">RG</a> | <a href="#">Homo sapiens</a> |
| ATF1                 | <a href="#">activating transcription factor 1(ATF1)</a>                       | <a href="#">RG</a> | <a href="#">Homo sapiens</a> |
| AURKA                | <a href="#">aurora kinase A(AURKA)</a>                                        | <a href="#">RG</a> | <a href="#">Homo sapiens</a> |
| CAV1                 | <a href="#">caveolin 1(CAV1)</a>                                              | <a href="#">RG</a> | <a href="#">Homo sapiens</a> |
| CCNB1                | <a href="#">cyclin B1(CCNB1)</a>                                              | <a href="#">RG</a> | <a href="#">Homo sapiens</a> |
| CCNB2                | <a href="#">cyclin B2(CCNB2)</a>                                              | <a href="#">RG</a> | <a href="#">Homo sapiens</a> |
| CDC25C               | <a href="#">cell division cycle 25C(CDC25C)</a>                               | <a href="#">RG</a> | <a href="#">Homo sapiens</a> |
| CDH17                | <a href="#">cadherin 17(CDH17)</a>                                            | <a href="#">RG</a> | <a href="#">Homo sapiens</a> |
| CDK1                 | <a href="#">cyclin dependent kinase 1(CDK1)</a>                               | <a href="#">RG</a> | <a href="#">Homo sapiens</a> |
| CDK6                 | <a href="#">cyclin dependent kinase 6(CDK6)</a>                               | <a href="#">RG</a> | <a href="#">Homo sapiens</a> |
| CDKN2C               | <a href="#">cyclin dependent kinase inhibitor 2C(CDKN2C)</a>                  | <a href="#">RG</a> | <a href="#">Homo sapiens</a> |
| CDKN3                | <a href="#">cyclin dependent kinase inhibitor 3(CDKN3)</a>                    | <a href="#">RG</a> | <a href="#">Homo sapiens</a> |
| COPS3                | <a href="#">COP9 signalosome subunit 3(COPS3)</a>                             | <a href="#">RG</a> | <a href="#">Homo sapiens</a> |
| CTGF                 | <a href="#">connective tissue growth factor(CTGF)</a>                         | <a href="#">RG</a> | <a href="#">Homo sapiens</a> |
| CXCL1                | <a href="#">C-X-C motif chemokine ligand 1(CXCL1)</a>                         | <a href="#">RG</a> | <a href="#">Homo sapiens</a> |
| DLEU2                | <a href="#">deleted in lymphocytic leukemia 2 (non-protein coding)(DLEU2)</a> | <a href="#">RG</a> | <a href="#">Homo sapiens</a> |
| DUSP1                | <a href="#">dual specificity phosphatase 1(DUSP1)</a>                         | <a href="#">RG</a> | <a href="#">Homo sapiens</a> |
| E2F5                 | <a href="#">E2F transcription factor 5(E2F5)</a>                              | <a href="#">RG</a> | <a href="#">Homo sapiens</a> |
| FAM72A               | <a href="#">family with sequence similarity 72 member A(FAM72A)</a>           | <a href="#">RG</a> | <a href="#">Homo sapiens</a> |
| FAM83D               | <a href="#">family with sequence similarity 83 member D(FAM83D)</a>           | <a href="#">RG</a> | <a href="#">Homo sapiens</a> |
| FOS                  | <a href="#">Fos proto-oncogene, AP-1</a>                                      | <a href="#">RG</a> | <a href="#">Homo</a>         |

| OFFICIAL_GENE_SYMBOL | Gene Name                                                                             | Related Genes      | Species                      |
|----------------------|---------------------------------------------------------------------------------------|--------------------|------------------------------|
|                      | <a href="#">transcription factor subunit(FOS)</a>                                     |                    | <a href="#">sapiens</a>      |
| FOXO1                | <a href="#">forkhead box O1(FOXO1)</a>                                                | <a href="#">RG</a> | <a href="#">Homo sapiens</a> |
| ID1                  | <a href="#">inhibitor of DNA binding 1, HLH protein(ID1)</a>                          | <a href="#">RG</a> | <a href="#">Homo sapiens</a> |
| ID2                  | <a href="#">inhibitor of DNA binding 2, HLH protein(ID2)</a>                          | <a href="#">RG</a> | <a href="#">Homo sapiens</a> |
| ISG15                | <a href="#">ISG15 ubiquitin-like modifier(ISG15)</a>                                  | <a href="#">RG</a> | <a href="#">Homo sapiens</a> |
| JUN                  | <a href="#">Jun proto-oncogene, AP-1 transcription factor subunit(JUN)</a>            | <a href="#">RG</a> | <a href="#">Homo sapiens</a> |
| KIF14                | <a href="#">kinesin family member 14(KIF14)</a>                                       | <a href="#">RG</a> | <a href="#">Homo sapiens</a> |
| KLF6                 | <a href="#">Kruppel like factor 6(KLF6)</a>                                           | <a href="#">RG</a> | <a href="#">Homo sapiens</a> |
| LIN9                 | <a href="#">lin-9 DREAM MuvB core complex component(LIN9)</a>                         | <a href="#">RG</a> | <a href="#">Homo sapiens</a> |
| LRIG3                | <a href="#">leucine rich repeats and immunoglobulin like domains 3(LRIG3)</a>         | <a href="#">RG</a> | <a href="#">Homo sapiens</a> |
| MEG3                 | <a href="#">maternally expressed 3 (non-protein coding)(MEG3)</a>                     | <a href="#">RG</a> | <a href="#">Homo sapiens</a> |
| MYC                  | <a href="#">v-myc avian myelocytomatosis viral oncogene homolog(MYC)</a>              | <a href="#">RG</a> | <a href="#">Homo sapiens</a> |
| NEAT1                | <a href="#">nuclear paraspeckle assembly transcript 1 (non-protein coding)(NEAT1)</a> | <a href="#">RG</a> | <a href="#">Homo sapiens</a> |
| PBK                  | <a href="#">PDZ binding kinase(PBK)</a>                                               | <a href="#">RG</a> | <a href="#">Homo sapiens</a> |
| PLK1                 | <a href="#">polo like kinase 1(PLK1)</a>                                              | <a href="#">RG</a> | <a href="#">Homo sapiens</a> |
| PTPRD                | <a href="#">protein tyrosine phosphatase, receptor type D(PTPRD)</a>                  | <a href="#">RG</a> | <a href="#">Homo sapiens</a> |
| SELENBP1             | <a href="#">selenium binding protein 1(SELENBP1)</a>                                  | <a href="#">RG</a> | <a href="#">Homo sapiens</a> |
| SGK1                 | <a href="#">serum/glucocorticoid regulated kinase 1(SGK1)</a>                         | <a href="#">RG</a> | <a href="#">Homo sapiens</a> |
| SPRY4                | <a href="#">sprouty RTK signaling antagonist 4(SPRY4)</a>                             | <a href="#">RG</a> | <a href="#">Homo sapiens</a> |
| TFPI2                | <a href="#">tissue factor pathway inhibitor 2(TFPI2)</a>                              | <a href="#">RG</a> | <a href="#">Homo sapiens</a> |
| TGFBI                | <a href="#">transforming growth factor beta induced(TGFBI)</a>                        | <a href="#">RG</a> | <a href="#">Homo sapiens</a> |
| UBE2C                | <a href="#">ubiquitin conjugating enzyme E2 C(UBE2C)</a>                              | <a href="#">RG</a> | <a href="#">Homo sapiens</a> |

| OFFICIAL_GENE_SYMBOL | Gene Name                                                                | Related Genes      | Species                      |
|----------------------|--------------------------------------------------------------------------|--------------------|------------------------------|
| UBE2QL1              | <a href="#">ubiquitin conjugating enzyme E2 Q family like 1(UBE2QL1)</a> | <a href="#">RG</a> | <a href="#">Homo sapiens</a> |
