# Supplementary material for: Defining a Characteristic Gene Expression Set Responsible for Cancer Stem Cell-Like Features in a Sub-Population of Ewing Sarcoma Cells CADO-ES1
Source: MDPI journal article supplement (doi:10.3390/ijms19123908), 2018-12-06
Supplement: s2 [file s2 › Supplementary_Figures_Tables.pdf]

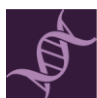

Article

# Defining a Characteristic Gene Expression Set Responsible for Cancer Stem Cell-Like Features in a Sub-Population of Ewing Sarcoma Cells CADO-ES1

Marc Hotfilder, Nikhil Mallela, Jochen Seggewiß, Uta Dirksen and Eberhard Korsching\*

Supplementary Figures and Tables

## 1. Supplementary Figures

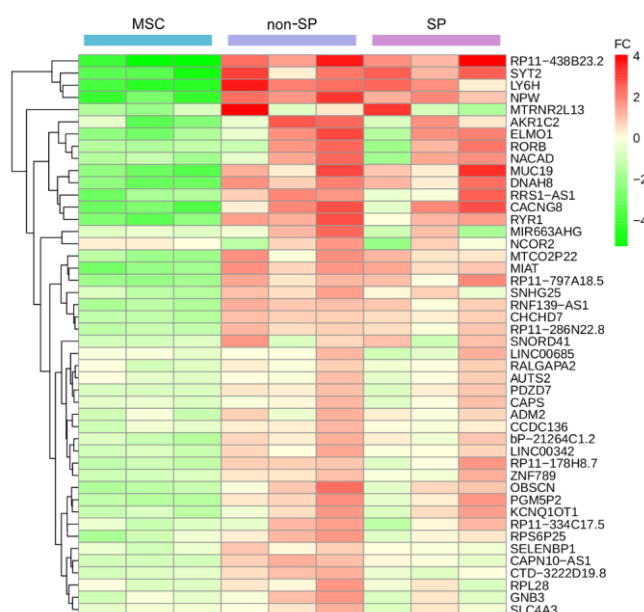

**Figure S1. Heatmap of the counts for 46 down-regulated genes from SET-3.**

The counts are quantile normalized (preprocessCore) and rlog transformed (DESeq2) prior to plotting. The color bar on the right is defining the fold change values (FC) concerning gene average. Green colors denote levels of down-regulation, while red colors indicate levels of up-regulation. The order of SP and non-SP experiments reflects their paired nature (1,2,3,1,2,3). The hierarchical cluster tree on the left is based on the Euclidean measure.

19

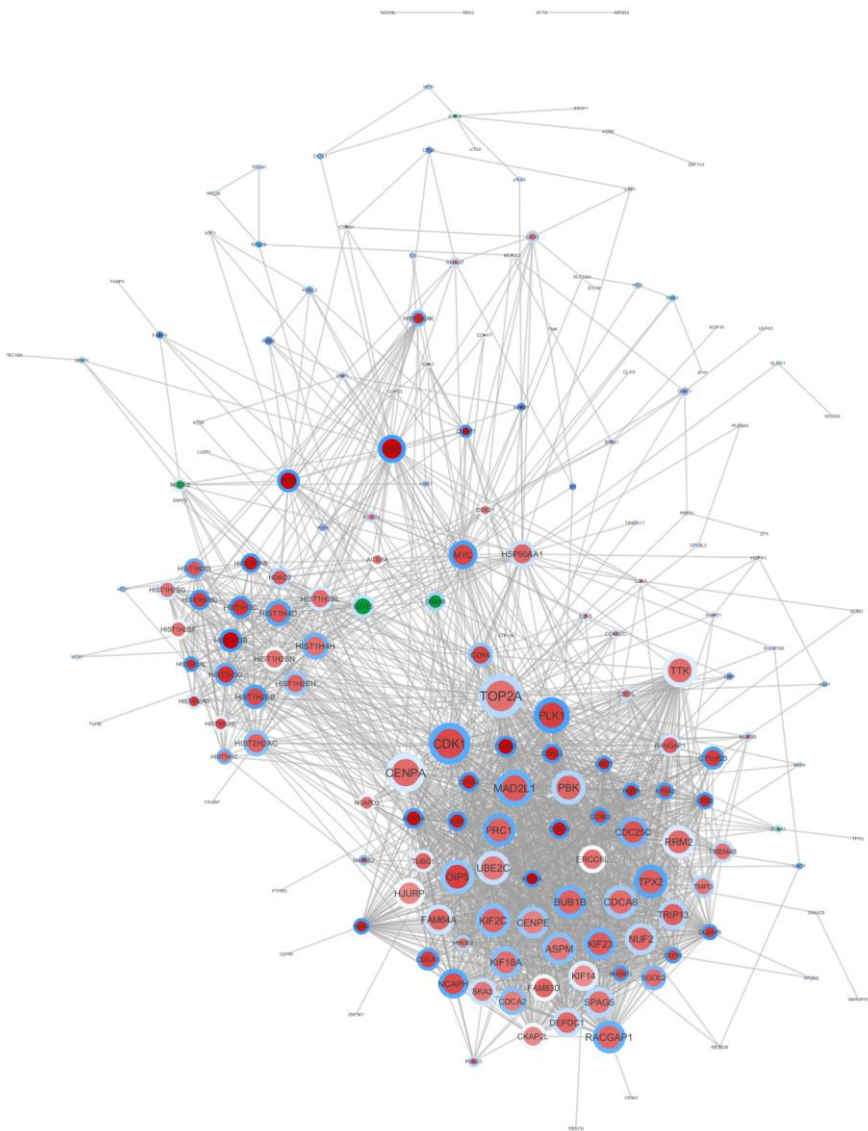

20

21 **Figure S2. Relevance network based on differential candidates of SET-2 and PPI information of**  
22 **STRINGdb.**

23 The gene products are represented by circles and their interactions are represented by edges. The  
24 size of the circles indicate the degree of connectivity to other partners. Larger the circle, greater the  
25 degree. Red circles represent the products of up-regulated DEGs and green circles represents  
26 products of down-regulated DEGs. The intensity of the colors correspond to the log2 fold changes.  
27 Higher the fold change, higher the color intensity. The blue color around the circles represents the  
28 P-value. Lower the P-value, higher the color intensity.

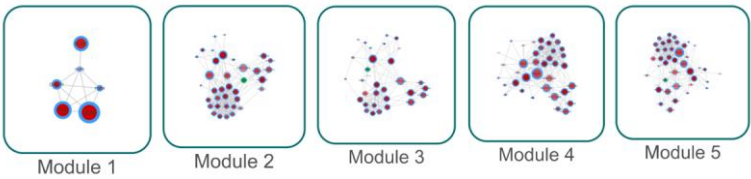

**Figure S3. Top 5 highest scoring sub-networks out of the full network.**

| Module name | jActiveModules | score value |
|-------------|----------------|-------------|
| Module 1    | 5.25           |             |
| Module 2    | 4.94           |             |
| Module 3    | 4.70           |             |
| Module 4    | 4.57           |             |
| Module 5    | 4.46           |             |

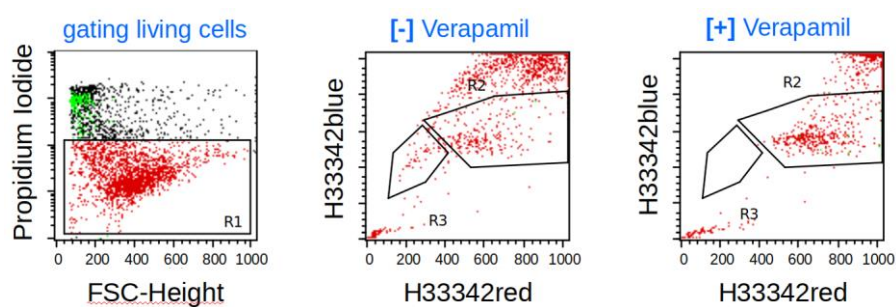

**Figure S4. Fluorescence activated cell sorting.**

The Hoechst 33342 staining was employed with a concentration of 5 μg/ml. The left panel is showing the living cells (gate R1) while the middle and right image shows the difference without Verapamil [-] and with Verapamil (50 μM) addition [+]. R2: non-SP gate and R3: SP gate.

45 **Supplementary Tables**

46

47

48 **Table S1.** The top five terms of GO analysis for the up-regulated DEGs using BiNGO application.

49

| Term                | Name                   | Counts | Gene Symbol                                  | p value  |
|---------------------|------------------------|--------|----------------------------------------------|----------|
| Biological Process  |                        |        |                                              |          |
| GO:0022403          | cell cycle phase       | 48     | SGOL2, CDK6, OIP5, PRC1, ...                 | 2.32e-31 |
| GO:0000279          | M phase                | 44     | NCAPD3, CDCA2, CEP55, PRC1, ...              | 3.10e-31 |
| GO:0006996          | organelle organization | 75     | HIST1H2BN, HIST1H2BF, PRC1, CKS2, ...        | 3.10e-31 |
| GO:0022402          | cell cycle process     | 52     | FAM83D, NCAPH, NUF2, KIF18A, ...             | 2.31e-30 |
| GO:0000278          | mitotic cell cycle     | 44     | CDC20, CDCA2, CCNB1, KIF2C, ...              | 5.60e-30 |
| Molecular Function  |                        |        |                                              |          |
| GO:0005515          | protein binding        | 125    | CDK1, LDHA, CDKN2C, CSE1L, ...               | 1.05e-07 |
| GO:0003677          | DNA binding            | 50     | HISTIH2AE, HIST1H3G, NUSAP1, TMPO, ...       | 5.22e-05 |
| GO:0005488          | binding                | 154    | LMO7, HIST1H2BL, HIST1H2AL, TTK, ...         | 5.22e-05 |
| GO:0003676          | nucleic acid binding   | 58     | ZNF480, HISTIH2AK, CENPA, HJURP, ...         | 1.31e-03 |
| GO:0019899          | enzyme binding         | 19     | TOP2A, HIST1H2AG, HDAC9, CDC20, ...          | 2.84e-03 |
| Cellular Components |                        |        |                                              |          |
| GO:0044427          | chromosomal part       | 44     | CENPE, PLK1, HIST1H2BF, KIF2C, ...           | 4.42e-31 |
| GO:0005694          | chromosome             | 46     | HIST1H4D, BUB1, HIST1H3B, CDCA8, ...         | 1.48e-30 |
| GO:0000786          | nucleosome             | 21     | HIST1H3G, HIST2H2AB, HIST1H2BN, HIST1H4H,... | 1.28e-23 |
| GO:0005819          | spindle                | 26     | DLGAP5, TTK, CDC20, BUB1, ...                | 2.23e-22 |
| GO:0005634          | nucleus                | 113    | HISTIH2AK, EPC1, NOP16, RACGAP1, ...         | 2.06e-20 |

50

**Table S2.** 43 of 312 DEGs are Oncogenes, fostering tumor stability or progression or suppressing tumor action : a classification breakdown.

|                | Tumor<br>Promotor<br>Properties | Tumor<br>Suppressor<br>Properties | Both<br>Properties | Total<br>Number |
|----------------|---------------------------------|-----------------------------------|--------------------|-----------------|
| up-regulated   | 21                              | 8                                 | 6                  | 35              |
| down-regulated | 1                               | 6                                 | 1                  | 8               |
| Total          | 22                              | 14                                | 7                  | 43              |

**Table S3.** The top five GO terms in each GO category having an overlap with study candidates associated with tumor formation or suppression (SET-1 oncogenes).

| Term               | Name                   | Gene Symbol                                                                                                                                                                                                                                                                                                                                                                                                                                                                                                                          | p value  |
|--------------------|------------------------|--------------------------------------------------------------------------------------------------------------------------------------------------------------------------------------------------------------------------------------------------------------------------------------------------------------------------------------------------------------------------------------------------------------------------------------------------------------------------------------------------------------------------------------|----------|
| Biological Process |                        |                                                                                                                                                                                                                                                                                                                                                                                                                                                                                                                                      |          |
| GO:0022403         | cell cycle phase       | PLK1 (Both), CDK6 (Both), CCNB2 (Oncogene), CDK1 (Oncogene), CDC25C (Oncogene), PBK (Oncogene), UBE2C (Oncogene), FAM83D (Oncogene), AURKA (Oncogene), CDKN3 (Oncogene), CCNB1 (Oncogene), CDKN2C (Tumor suppressor gene)                                                                                                                                                                                                                                                                                                            | 2.32e-31 |
| GO:0000279         | M phase                | PLK1 (Both), CCNB2 (Oncogene), CDK1 (Oncogene), CDC25C (Oncogene), PBK (Oncogene), UBE2C (Oncogene), FAM83D (Oncogene), AURKA (Oncogene), CCNB1 (Oncogene)                                                                                                                                                                                                                                                                                                                                                                           | 3.10e-31 |
| GO:0006996         | organelle organization | PLK1 (Both), CAV1 (Both), CXCL1 (Oncogene), CCNB2 (Oncogene), CDK1 (Oncogene), PBK (Oncogene), UBE2C (Oncogene), FAM83D (Oncogene), AURKA (Oncogene), CCNB1 (Oncogene), JUN (Oncogene)                                                                                                                                                                                                                                                                                                                                               | 3.10e-31 |
| GO:0022402         | cell cycle process     | PLK1 (Both), CDK6 (Both), CCNB2 (Oncogene), MYC (Oncogene), CDK1 (Oncogene), CDC25C (Oncogene), PBK (Oncogene), UBE2C (Oncogene), FAM83D (Oncogene), AURKA (Oncogene), CDKN3 (Oncogene), CCNB1 (Oncogene), CDKN2C (Tumor suppressor gene)                                                                                                                                                                                                                                                                                            | 2.31e-30 |
| GO:0000278         | mitotic cell cycle     | PLK1 (Both), CDK6 (Both), CCNB2 (Oncogene), CDK1 (Oncogene), CDC25C (Oncogene), PBK (Oncogene), UBE2C (Oncogene), FAM83D (Oncogene), AURKA (Oncogene), CDKN3 (Oncogene), CCNB1 (Oncogene), CDKN2C (Tumor suppressor gene)                                                                                                                                                                                                                                                                                                            | 5.60e-30 |
| Molecular Function |                        |                                                                                                                                                                                                                                                                                                                                                                                                                                                                                                                                      |          |
| GO:0005515         | protein binding        | PLK1 (Both), CDK6 (Both), CAV1 (Both), FOXO1 (Both), CTGF (Both), CXCL1 (Oncogene), CCNB2 (Oncogene), ID1 (Oncogene), MYC (Oncogene), CDK1 (Oncogene), CDC25C (Oncogene), ID2 (Oncogene), PBK (Oncogene), UBE2C (Oncogene), ATF1 (Oncogene), E2F5 (Oncogene), KIF14 (Oncogene), COPS3 (Oncogene), SGK1 (Oncogene), AURKA (Oncogene), CDKN3 (Oncogene), CCNB1 (Oncogene), JUN (Oncogene), FOS (Oncogene), SPRY4 (Tumor suppressor gene), LRIG3 (Tumor suppressor gene), CDKN2C (Tumor suppressor gene), DUSP1 (Tumor suppressor gene) | 1.05e-07 |
| GO:0003677         | DNA binding            | KLF6 (Both), POXO1 (Both), MYC (Oncogene), ATF1 (Oncogene), E2F5 (Oncogene), JUN (Oncogene), FOS (Oncogene)                                                                                                                                                                                                                                                                                                                                                                                                                          | 5.22e-05 |
| GO:0005488         | binding                | PLK1 (Both), KLF6 (Both), CDK6 (Both), CAV1 (Both), FOXO1 (Both), CTGF (Both), CXCL1 (Oncogene), CCNB2                                                                                                                                                                                                                                                                                                                                                                                                                               | 5.22e-05 |

|                     |                      |                                                                                                                                                                                                                                                                                                                                                                                                                                                                             |          |
|---------------------|----------------------|-----------------------------------------------------------------------------------------------------------------------------------------------------------------------------------------------------------------------------------------------------------------------------------------------------------------------------------------------------------------------------------------------------------------------------------------------------------------------------|----------|
|                     |                      | (Oncogene), ID1 (Oncogene), MYC (Oncogene), CDK1 (Oncogene), CDC25C (Oncogene), ID2 (Oncogene), PBK (Oncogene), UBE2C (Oncogene), ATF1 (Oncogene), E2F5 (Oncogene), KIF14 (Oncogene), COPS3 (Oncogene), SGK1 (Oncogene), AURKA (Oncogene), CDKN3 (Oncogene), CCNB1 (Oncogene), JUN (Oncogene), FOS (Oncogene), SPRY4 (Tumor suppressor gene), LRIG3 (Tumor suppressor gene), CDKN2C (Tumor suppressor gene), UBE2QL1 (Tumor suppressor gene), DUSP1 (Tumor suppressor gene) |          |
| GO:0003676          | nucleic acid binding | KLF6 (Both), FOXO1 (Both), MYC (Oncogene), ATF1 (Oncogene), E2F5 (Oncogene), JUN (Oncogene), FOS (Oncogene)                                                                                                                                                                                                                                                                                                                                                                 | 1.31e-03 |
| GO:0019899          | enzyme binding       | PLK1 (Both), CAV1 (Both), AURKA (Oncogene), CCNB1 (Oncogene), CDKN2C (Tumor suppressor gene), DUSP1 (Tumor suppressor gene)                                                                                                                                                                                                                                                                                                                                                 | 2.84e-03 |
| Cellular Components |                      |                                                                                                                                                                                                                                                                                                                                                                                                                                                                             |          |
| GO:0044427          | chromosomal part     | PLK1 (Both), ID2 (Oncogene), CCNB1 (Oncogene), JUN (Oncogene)                                                                                                                                                                                                                                                                                                                                                                                                               | 4.42e-31 |
| GO:0005694          | chromosome           | PLK1 (Both), ID2 (Oncogene), CCNB1 (Oncogene), JUN (Oncogene)                                                                                                                                                                                                                                                                                                                                                                                                               | 1.48e-30 |
| GO:0000786          | nucleosome           | [no tumor associated overlap]                                                                                                                                                                                                                                                                                                                                                                                                                                               | 1.28e-23 |
| GO:0005819          | spindle              | MYC (Oncogene) CDK1 (Oncogene), KIF14 (Oncogene), FAM83D (Oncogene), AURKA (Oncogene), CCNB1 (Oncogene)                                                                                                                                                                                                                                                                                                                                                                     | 2.23e-22 |
| GO:0005634          | nucleus              | PLK1 (Both), KLF6 (Both), CDK6 (Both), FOXO1 (Both), CCNB2 (Oncogene), ID1 (Oncogene), MYC (Oncogene), CDK1 (Oncogene), CDC25C (Oncogene), ID2 (Oncogene), UBE2C (Oncogene), ATF1 (Oncogene), E2F5 (Oncogene), KIF14 (Oncogene), COPS3 (Oncogene), SGK1 (Oncogene), AURKA (Oncogene), CCNB1 (Oncogene), JUN (Oncogene), FOS (Oncogene), LIN9 (Tumor suppressor gene), CDKN2C (Tumor suppressor gene), DUSP1 (Tumor suppressor gene)                                         | 2.06e-20 |

**Table S4.** The top 10 KEGG and REACTOME pathways having an overlap with study candidates associated with tumor formation or suppression (SET-1 oncogenes).

| Identifier        | Name                                    | Gene Symbol                                                                                                                                                       | p value  |
|-------------------|-----------------------------------------|-------------------------------------------------------------------------------------------------------------------------------------------------------------------|----------|
| KEGG Pathways     |                                         |                                                                                                                                                                   |          |
| hsa05034          | Alcoholism                              | [no tumor associated overlap]                                                                                                                                     | 6.96e-13 |
| hsa05322          | Systemic lupus erythematosus            | [no tumor associated overlap]                                                                                                                                     | 4.37e-13 |
| hsa04110          | Cell cycle                              | PLK1 (Both), CDK6 (Both), CCNB2 (Oncogene), MYC (Oncogene), CDK1 (Oncogene), CDC25C (Oncogene), E2F5 (Oncogene), CCNB1 (Oncogene), CDKN2C (Tumor suppressor gene) | 4.30e-09 |
| hsa05203          | Viral carcinogenesis                    | CDK6 (Both), CDK1 (Oncogene), JUN (Oncogene)                                                                                                                      | 3.00e-07 |
| hsa04914          | Progesterone-mediated oocyte maturation | PLK1 (Both), CCNB2 (Oncogene), CDK1 (Oncogene), CDC25C (Oncogene), CCNB1 (Oncogene)                                                                               | 1.58e-04 |
| hsa04114          | Oocyte meiosis                          | PLK1 (Both), CDK1 (Oncogene), CDC25C (Oncogene), AURKA (Oncogene)                                                                                                 | 3.12e-02 |
| hsa05202          | Transcriptional misregulation in cancer | FOXO1 (Both), MYC (Oncogene), ID2 (Oncogene), ATF1 (Oncogene), CDKN2C (Tumor suppressor gene)                                                                     | 5.40e-02 |
| hsa04115          | p53 signaling pathway                   | CDK6 (Both), CCNB2 (Oncogene), CDK1 (Oncogene), CCNB1 (Oncogene)                                                                                                  | 1.04e-01 |
| hsa04350          | TGF-beta signaling pathway              | ID1 (Oncogene), MYC (Oncogene), ID2 (Oncogene), E2F5 (Oncogene)                                                                                                   | 1.92e-01 |
| hsa05166          | HTLV-1 infection                        | MYC (Oncogene), ATF1 (Oncogene), JUN (Oncogene), FOS (Oncogene), CDKN2C (Tumor suppressor gene)                                                                   | 2.92e-01 |
| REACTOME Pathways |                                         |                                                                                                                                                                   |          |
| 5334118           | DNA methylation                         | [no tumor associated overlap]                                                                                                                                     | 8.55e-15 |
| 2299718           | Condensation of Prophase Chromosomes    | PLK1 (Both), CDK1 (Oncogene), CCNB1 (Oncogene)                                                                                                                    | 8.55e-15 |
| 68886             | M Phase                                 | PLK1 (Both), CCNB2 (Oncogene), CDK1 (Oncogene), UBE2C (Oncogene), CCNB1 (Oncogene)                                                                                | 8.55e-15 |
| 68875             | Mitotic Prophase                        | PLK1 (Both), CCNB2 (Oncogene), CDK1 (Oncogene), CCNB1 (Oncogene)                                                                                                  | 8.55e-15 |
| 2559582           | Senescence-                             | CDK6 (Both), UBE2C (Oncogene), JUN (Oncogene),                                                                                                                    | 8.55e-15 |

|         | Associated<br>Secretory<br>Phenotype<br>(SASP) | FOS (Oncogene), CDKN2C (Tumor suppressor gene)                                                                                                                                                                                      |          |
|---------|------------------------------------------------|-------------------------------------------------------------------------------------------------------------------------------------------------------------------------------------------------------------------------------------|----------|
| 69278   | Cell Cycle,<br>Mitotic                         | PLK1 (Both), CDK6 (Both), CCNB2 (Oncogene), MYC (Oncogene), CDK1 (Oncogene), CDC25C (Oncogene), UBE2C (Oncogene), E2F5 (Oncogene), AURKA (Oncogene), CCNB1 (Oncogene), LIN9 (Tumor suppressor gene), CDKN2C (Tumor suppressor gene) | 8.55e-15 |
| 1640170 | Cell Cycle                                     | PLK1 (Both), CDK6 (Both), CCNB2 (Oncogene), MYC (Oncogene), CDK1 (Oncogene), CDC25C (Oncogene), UBE2C (Oncogene), E2F5 (Oncogene), AURKA (Oncogene), CCNB1 (Oncogene), LIN9 (Tumor suppressor gene), CDKN2C (Tumor suppressor gene) | 8.55e-15 |
| 73728   | RNA Polymerase<br>I Promoter<br>Opening        | [no tumor associated overlap]                                                                                                                                                                                                       | 8.55e-15 |
| 212300  | PRC2 methylates<br>histones and<br>DNA         | [no tumor associated overlap]                                                                                                                                                                                                       | 4.13e-14 |
| 2559580 | Oxidative Stress<br>Induced<br>Senescence      | CDK6 (Both), JUN (Oncogene), FOS (Oncogene), CDKN2C (Tumor suppressor gene)                                                                                                                                                         | 4.13e-14 |
